# Supplementary material for: The Presence of Opportunistic Premise Plumbing Pathogens in Residential Buildings: A Literature Review
Source: MDPI journal article supplement (doi:10.3390/w14071129), 2022-04-01
Supplement: s1 [file s1]

**Table S1.** Summary of reports and studies identifying opportunistic premise plumbing pathogens in residential drinking water systems.

| Study Site                            | Reservoir                         | Pathogen <sup>a</sup>                                                                   | Prevalence <sup>b</sup>                               | Detection Method <sup>c</sup> | Antimicrobial Characteristics <sup>d</sup> | Country <sup>e</sup>                                                                        | Year <sup>f</sup> | Reference <sup>e</sup> |
|---------------------------------------|-----------------------------------|-----------------------------------------------------------------------------------------|-------------------------------------------------------|-------------------------------|--------------------------------------------|---------------------------------------------------------------------------------------------|-------------------|------------------------|
| House<br>Commercial building<br>Hotel | Tap                               | <i>Legionella</i> spp.                                                                  | Water:<br>19.8% total buildings *                     | Culture                       | N/A                                        | USA                                                                                         | 2002              | [9]                    |
| House                                 | Washing machine                   | <i>Methylobacterium</i> spp.<br><i>Pseudomonas</i> spp.<br><i>Stenotrophomonas</i> spp. | Not specified                                         | Culture                       | N/A                                        | USA<br>Switzerland<br>Germany<br>South Korea                                                | 2010 <sup>f</sup> | [30]                   |
| House                                 | Tap                               | <i>Pseudomonas</i> spp.                                                                 | Not specified                                         | Culture                       | N/A                                        | Australia<br>Germany<br>India<br>Malaysia<br>Saudi Arabia<br>South Africa<br>England<br>USA | 2009              | [31]                   |
| House                                 | Water                             | NTM                                                                                     | Water:<br>12% *                                       | N/A                           | N/A                                        | USA and Finland                                                                             | 2015 <sup>f</sup> | [32]                   |
| House<br>Hotel<br>University          | Sink                              | <i>P. aeruginosa</i>                                                                    | Biofilm:<br>26.1% *                                   | Culture                       | N/A                                        | Nigeria                                                                                     | 2013 <sup>f</sup> | [33]                   |
| House<br>Hotel                        | Cooling tower                     | <i>L. pneumophila</i>                                                                   | Water:<br>22.5% *                                     | Culture                       | N/A                                        | Iran                                                                                        | 2015              | [34]                   |
| House<br>Accommodation sites          | Hot water system<br>Shower<br>Tap | <i>Legionella</i> spp.                                                                  | Water:<br>71.4% accommodation buildings (>1000 CFU/L) | Culture                       | N/A                                        | Hungary                                                                                     | 2013              | [35]                   |

|                                                                                                               |                                                |                                                     |                                                                                                                                                                                                |                       |                           |         |                   |      |
|---------------------------------------------------------------------------------------------------------------|------------------------------------------------|-----------------------------------------------------|------------------------------------------------------------------------------------------------------------------------------------------------------------------------------------------------|-----------------------|---------------------------|---------|-------------------|------|
| 61.5% house (central hot water supplies 50 CFU/L)<br>7.7% house (individual hot water supplies 50–5300 CFU/L) |                                                |                                                     |                                                                                                                                                                                                |                       |                           |         |                   |      |
| House Commercial building                                                                                     | Tap                                            | <i>L. pneumophila</i><br><i>M. avium</i>            | Water:<br><i>L. pneumophila</i> : 38% (3188 CE/L)<br><i>M. avium</i> : 42% (2006 CE/L)                                                                                                         | Culture and molecular | N/A                       | USA     | 2014              | [36] |
| Public bath House                                                                                             | Bath                                           | <i>Legionella</i> spp.<br><i>Mycobacterium</i> spp. | Water:<br>Public bath:<br><i>Legionella</i> spp.: 3% ( $<10 \times 10^4$ CFU/100mL)<br>NTM: 0.6% *<br>House bath:<br><i>Legionella</i> spp: 60.5% ( $<10 \times 10^4$ CFU/100mL)<br>NTM: 21% * | Culture               | N/A                       | Japan   | 2009–2011         | [37] |
| House Commercial building                                                                                     | Tap                                            | <i>P. aeruginosa</i>                                | Water:<br>40% (1–75 CFU/100mL)                                                                                                                                                                 | Culture               | Disc diffusion: 54.5% MDR | India   | 2003              | [38] |
| House DWDS                                                                                                    | Tap                                            | <i>Aeromonas</i> spp.                               | Not specified                                                                                                                                                                                  | Culture               | N/A                       | Canada  | 1997 <sup>f</sup> | [39] |
| Hotel Retirement home                                                                                         | Water                                          | <i>Legionella</i> spp.                              | Water:<br>66.6% of seasonal facilities (450 CFU/L <sup>-1</sup> )                                                                                                                              | Culture               | N/A                       | Croatia | 2009              | [40] |
| House DWDS                                                                                                    | Shower Tap<br>Municipal water<br>Cooling tower | <i>Legionella</i> spp.                              | Water:<br>30% *<br>Biofilm:<br>56% *                                                                                                                                                           | Culture               | N/A                       | USA*    | 1992 <sup>f</sup> | [41] |
| House DWDS                                                                                                    | Tap                                            | <i>H. pylori</i>                                    | Water: 15% *                                                                                                                                                                                   | Culture and molecular | N/A                       | England | 2004 <sup>f</sup> | [42] |

|              |          |                                                                                                   |                                                                                                                                                                                                                                                                                                                                                                                                                                                                                                   |           |     |              |                   |      |
|--------------|----------|---------------------------------------------------------------------------------------------------|---------------------------------------------------------------------------------------------------------------------------------------------------------------------------------------------------------------------------------------------------------------------------------------------------------------------------------------------------------------------------------------------------------------------------------------------------------------------------------------------------|-----------|-----|--------------|-------------------|------|
| House School | Water    | NTM                                                                                               | Water:<br>65% houses ( $1\text{--}3 \times 10^2$ CFU/L)<br>100% water meter ( $5 \times 10^2$ CFU/L)<br>100% schools ( $1.6 \times 10^2\text{--}6 \times 10^2$ CFU/L)<br>100% swimming pools ( $2.9 \times 10^1\text{--}3.1 \times 10^4$ CFU/L)<br>Biofilm:<br>100% house (shower floor) ( $1 \times 10^2\text{--}1.2 \times 10^5$ CFU/cm <sup>2</sup> )<br>67% public building (shower floor) ( $5\text{--}3.7 \times 10^3$ CFU/cm <sup>2</sup> )<br>50% pool edge ( $4.5$ CFU/cm <sup>2</sup> ) | Culture   | N/A | Italy        | 2014 <sup>f</sup> | [43] |
| House        | Tap Well | <i>Acinetobacter haemolyticus</i><br><i>Aeromonas hydrophila</i><br><i>Pseudomonas aeruginosa</i> | Water:<br><i>P. aeruginosa</i> : 11.36% well water (166.7 CFU/mL)<br><i>A. haemolyticus</i> : 11.1% tap water (333.3 CFU/mL)<br><i>A. hydrophila</i> : 6.82% tap water (333.3 CFU/mL)                                                                                                                                                                                                                                                                                                             | Culture   | N/A | Saudi Arabia | 2014              | [44] |
| House        | Water    | <i>Legionella</i> spp.                                                                            | Water: 77.5% *                                                                                                                                                                                                                                                                                                                                                                                                                                                                                    | Molecular | N/A | USA          | 2016              | [45] |
| House        | Tap      | <i>Helicobacter</i> spp.                                                                          | Water: 12% *                                                                                                                                                                                                                                                                                                                                                                                                                                                                                      | Molecular | N/A | Sweden       | 1998 <sup>f</sup> | [46] |
| House        | Tap      | <i>A. hydrophila</i>                                                                              | Water: Contaminated well water linked to 1                                                                                                                                                                                                                                                                                                                                                                                                                                                        | Culture   | N/A | USA          | 2015              | [47] |

| recurrent clinical case * |                         |                                                     |                                                                                                         |                       |                                                                                                                                                                                                                                                                        |          |                   |      |
|---------------------------|-------------------------|-----------------------------------------------------|---------------------------------------------------------------------------------------------------------|-----------------------|------------------------------------------------------------------------------------------------------------------------------------------------------------------------------------------------------------------------------------------------------------------------|----------|-------------------|------|
| House                     | Water                   | <i>L. pneumophila</i>                               | Water:<br>15.9% *                                                                                       | Molecular             | N/A                                                                                                                                                                                                                                                                    | USA      | 2020 <sup>f</sup> | [48] |
| House                     | Well                    | <i>P. aeruginosa</i><br><i>Acinetobacter</i> spp.   | Water:<br><i>P. aeruginosa</i> :<br>17 urban *<br>19 rural *<br><i>Acinetobacter</i> spp.:<br>5 urban * | Culture               | Disc diffusion:<br><i>P. aeruginosa</i> :<br>2.8% R PIP <sup>R</sup><br>5.6% R CIP <sup>R</sup><br>5.6% R NET <sup>R</sup><br><i>Acinetobacter</i> spp.:<br>62.5% R AMP <sup>R</sup><br>37.5% R AMX <sup>R</sup><br>50% R CFZ <sup>R</sup><br>37.5% R SEF <sup>R</sup> | India    | 2009              | [49] |
| House                     | Tap                     | <i>Pseudomonas</i> spp.                             | Water:<br>Rain water: 25% *<br>Well water: 75% *                                                        | Culture               | Disc diffusion:<br>100% R AMP <sup>R</sup><br>100% R COL <sup>R</sup><br>75% R GEN <sup>R</sup><br>100% R STR <sup>R</sup><br>100% R TET <sup>R</sup><br>50% R COT <sup>R</sup>                                                                                        | Nigeria  | 2011              | [50] |
| House                     | Water                   | <i>Legionella</i> spp.<br><i>Mycobacterium</i> spp. | Water:<br><i>Legionella</i> spp:<br>86.7% *<br><i>Mycobacterium</i> spp.: 68.1% *                       | Culture and molecular | N/A                                                                                                                                                                                                                                                                    | USA      | 2020 <sup>f</sup> | [51] |
| House                     | Shower Tap Water heater | <i>L. pneumophila</i>                               | Water:<br>Water heater linked to 1 clinical case (10 <sup>9</sup> CFU/L)                                | Culture               | N/A                                                                                                                                                                                                                                                                    | USA      | 2001 <sup>f</sup> | [52] |
| House                     | Tap                     | <i>P. aeruginosa</i>                                | Water:<br>7.14% *                                                                                       | Culture               | Disc diffusion:<br>100% AMC <sup>R</sup><br>100% AMP <sup>R</sup><br>100% CHL <sup>R</sup><br>100% TET <sup>R</sup><br>100% SXT <sup>R</sup><br>50% CRO <sup>R</sup><br>40% GEN <sup>R</sup>                                                                           | Ethiopia | 2013              | [53] |

|       |                            |                               |                                                                             |         |                                                                                                                                                                                                                                                                                                                                                                                                                                                                   |              |                   |      |
|-------|----------------------------|-------------------------------|-----------------------------------------------------------------------------|---------|-------------------------------------------------------------------------------------------------------------------------------------------------------------------------------------------------------------------------------------------------------------------------------------------------------------------------------------------------------------------------------------------------------------------------------------------------------------------|--------------|-------------------|------|
| House | Hot water system<br>Shower | <i>Legionella pneumophila</i> | Water:<br>23.3% hot water system *<br>7.5% tap water *<br>6% shower water * | Culture | Disc diffusion:<br>100% CIP <sup>S</sup><br>100% RIF <sup>S</sup><br>89.2% AZM <sup>R</sup><br>71.4% MXF <sup>R</sup><br>64.3% CLR <sup>R</sup><br>35.7% TGC <sup>R</sup><br>32.1% ERY <sup>R</sup><br>21.4% CRO <sup>R</sup><br>17.8% DOX <sup>R</sup><br>14.2% LVX <sup>R</sup>                                                                                                                                                                                 | Iraq         | 2019 <sup>f</sup> | [54] |
| House | Tap Water storage          | <i>Aeromonas</i> spp.         | Water:<br>Tap: 6% *<br>Water storage: 12% *                                 | Culture | Disc diffusion:<br>55% R AMP <sup>R</sup><br>48% R ERY <sup>R</sup><br>41% R AMC <sup>R</sup><br>28% R CAZ <sup>R</sup><br>27% R FOX <sup>R</sup><br>26% R CRO <sup>R</sup><br>26% CTX <sup>R</sup><br>22% R PIP <sup>R</sup><br>14% R SXT <sup>R</sup><br>12% R TET <sup>R</sup><br>11% R ATM <sup>R</sup><br>8% R MEM <sup>R</sup><br>6% R IPM <sup>R</sup><br>2% R NAL <sup>R</sup><br>1% R CIP <sup>R</sup><br>1% R TOB <sup>R</sup><br>1% R GEN <sup>R</sup> | Turkey       | 2005              | [55] |
| House | Tap                        | <i>P. aeruginosa</i>          | Water:<br>100% (10 <sup>5</sup> –10 <sup>9</sup> CFU)                       | Culture | Disc diffusion:<br>13 isolates MDR                                                                                                                                                                                                                                                                                                                                                                                                                                | Iran         | 2019 <sup>f</sup> | [56] |
| House | Water                      | <i>Aeromonas</i> spp.         | Not specified                                                               | Culture | Disc diffusion:<br>CHL <sup>R</sup><br>PEN <sup>R</sup><br>AMP <sup>R</sup><br>CLOXA <sup>R</sup>                                                                                                                                                                                                                                                                                                                                                                 | South Africa | 2006              | [57] |
| House | Water                      | <i>P. aeruginosa</i>          | Water:<br>House: 2.13% *                                                    | Culture | Disc diffusion:<br>13.2% MDR                                                                                                                                                                                                                                                                                                                                                                                                                                      | Italy        | 2015              | [58] |

|       |               |                                                                                                         |                                                                                                                                                                                                                         |           |                                                                                                                              |              |                   |      |
|-------|---------------|---------------------------------------------------------------------------------------------------------|-------------------------------------------------------------------------------------------------------------------------------------------------------------------------------------------------------------------------|-----------|------------------------------------------------------------------------------------------------------------------------------|--------------|-------------------|------|
| House | Water storage | <i>Pseudomonas</i> spp.<br><i>S. maltophila</i><br><i>Acinetobacter lwoffii</i><br><i>A. hydrophila</i> | Water:<br><i>P. aeruginosa</i> 6% *<br><i>P. fluorescens</i> 6.75% *<br><i>P. luteola</i> 0.7% *<br><i>P. stutzeri</i> 2.2% *<br><i>S. maltophila</i> 1.5% *<br><i>A. lwoffii</i> 7.5% *<br><i>A. hydrophila</i> 0.7% * | Culture   | Broth microdilution: 80.6% MDR                                                                                               | South Africa | 2012              | [59] |
| House | Dishwasher    | <i>S. maltophila</i><br><i>P. aeruginosa</i>                                                            | Biofilm:<br><i>S. maltophila</i> : 33% *<br><i>P. aeruginosa</i> : 20% *                                                                                                                                                | Culture   | Broth microdilution: 57% R CTX <sup>R</sup><br>70% R CAZ <sup>R</sup>                                                        | Slovenia*    | 2019 <sup>f</sup> | [60] |
| House | Sink U-bend   | <i>Pseudomonas</i> spp.<br><i>S. maltophila</i><br><i>A. hydrophila</i><br><i>A. baumannii</i>          | Biofilm:<br><i>Pseudomonas putida</i> : 20.9% *<br><i>P. aeruginosa</i> : 18.7% *<br><i>A. hydrophila</i> : 12.1% *<br><i>S. maltophila</i> : 11% *<br><i>A. baumannii</i> : 2.2% *                                     | Molecular | VITEK-2:<br><i>P. aeruginosa</i> (1) isolate MDR<br><i>S. maltophila</i> (3) isolates MDR<br><br>BAC <sup>R</sup> >640 µg/mL | Germany      | 2018              | [61] |
| House | Tap           | <i>A. hydrophila</i>                                                                                    | Biofilm: 24% *                                                                                                                                                                                                          | Culture   | VITEK-2:<br>TIC <sup>R</sup><br>CAZ <sup>R</sup><br>ATM <sup>R</sup><br>MIN <sup>I</sup>                                     | Iraq         | 2019 <sup>f</sup> | [62] |
| House | Water         | <i>L. pneumophila</i><br><i>Acinetobacter</i> spp.<br><i>Pseudomonas</i> spp.                           | Water: 5% *                                                                                                                                                                                                             | Molecular | <i>P. aeruginosa</i> aph(3')-I                                                                                               | China        | 2019 <sup>f</sup> | [63] |
| House | Shower drain  | <i>S. maltophila</i><br><i>P. aeruginosa</i><br><i>Acinetobacter</i> spp.<br><i>Aeromonas</i> spp.      | Biofilm:<br><i>S. maltophila</i> : 27.9% *<br><i>P. aeruginosa</i> : 9.3% *                                                                                                                                             | Culture   | <i>Bla</i> CMY-2, <i>bla</i> ACT/MIR and <i>bla</i> OXA-48                                                                   | Germany      | 2019              | [64] |

|                                                                          |                 |                                                    |                                                                                                          |           |                                                                                                    |                |                   |      |
|--------------------------------------------------------------------------|-----------------|----------------------------------------------------|----------------------------------------------------------------------------------------------------------|-----------|----------------------------------------------------------------------------------------------------|----------------|-------------------|------|
| <i>Acinetobacter</i> spp.:<br>1.6% *<br><i>Aeromonas</i> spp.:<br>3.9% * |                 |                                                    |                                                                                                          |           |                                                                                                    |                |                   |      |
| Drinking water distribution system                                       | Water           | <i>Aeromonas</i> spp.                              | Water: 32.4% *                                                                                           | Culture   | 100% AMP <sup>R</sup><br>100% PMB <sup>R</sup><br>77.8% CEF <sup>R</sup><br>83.3% ERY <sup>R</sup> | India          | 1999 <sup>f</sup> | [65] |
| House                                                                    | Shower          | <i>P. aeruginosa</i>                               | Water: Shower water linked to 1 clinical case *                                                          | Culture   | N/A                                                                                                | Israel         | 1986              | [66] |
| House                                                                    | Bath            | <i>M. avium</i>                                    | Water: Bath water linked to 1 clinical case*                                                             | Culture   | RIF <sup>R</sup><br>STR <sup>R</sup><br>EMB <sup>R</sup>                                           | Japan*         | 2000              | [67] |
| House                                                                    | Water           | <i>Pseudomonas</i> spp.                            | Water: 20.8% (6–1100 CFU/ 250 mL)                                                                        | Culture   | N/A                                                                                                | Cyprus         | 2015 <sup>f</sup> | [68] |
| Drinking water distribution system                                       | Municipal water | <i>L. pneumophila</i><br><i>Mycobacterium</i> spp. | Biofilm and Water: <i>Mycobacterium</i> spp.: 66% buildings *<br><i>L. pneumophila</i> : 83% buildings * | Molecular | N/A                                                                                                | Canada         | 2018              | [69] |
| House                                                                    | Shower Tap      | <i>L. pneumophila</i>                              | Water: Residential water linked to 2 clinical cases ( $6 \times 10^3$ – $2.3 \times 10^4$ CFU/L)         | Culture   | N/A                                                                                                | Israel*        | 2003 <sup>f</sup> | [70] |
| House                                                                    | Tap             | <i>Pseudomonas</i> spp.<br><i>S. maltophilia</i>   | Not specified                                                                                            | Culture   | N/A                                                                                                | Canada*        | 1988              | [71] |
| House                                                                    | Tap             | <i>Mycobacterium xenopei</i>                       | Water: 6% *                                                                                              | Culture   | N/A                                                                                                | United Kingdom | 1970 <sup>f</sup> | [72] |
| House                                                                    | Shower          | <i>Mycobacterium xenopi</i>                        | Biofilm: 95.4% *<br>Water: 90.9% *                                                                       | Culture   | N/A                                                                                                | Czech Republic | 1990              | [73] |
| House                                                                    | Tap             | <i>L. pneumophila</i><br><i>M. avium</i>           | Not specified                                                                                            | Culture   | N/A                                                                                                | USA            | 2007              | [74] |

|       |                    |                                                                                 |                                                                                                              |                       |     |                |                   |      |
|-------|--------------------|---------------------------------------------------------------------------------|--------------------------------------------------------------------------------------------------------------|-----------------------|-----|----------------|-------------------|------|
| House | Tap                | <i>Mycobacterium</i> spp.                                                       | Water: 39.42% *                                                                                              | Culture and molecular | N/A | India          | 2000              | [75] |
| House | Tap                | NTM                                                                             | Water: 16% *                                                                                                 | Culture               | N/A | Mexico         | 2009              | [76] |
| House | Tap                | <i>Mycobacterium</i> spp.                                                       | Water: 25% (4–1600 CFU/L)                                                                                    | Culture               | N/A | Germany        | 1992              | [77] |
| DWDS  | Water              | <i>Mycobacterium</i> spp.                                                       | Water: 38.7% *                                                                                               | Culture               | N/A | Czech Republic | 1994 <sup>f</sup> | [78] |
| House | Water              | <i>M. xenopi</i>                                                                | Water: 45.5% of patients' houses<br>29.4% of neighbours' houses*                                             | Culture               | N/A | Prague         | 1993 <sup>f</sup> | [79] |
| House | Tap                | NTM                                                                             | Water: 33.9% *                                                                                               | Culture               | N/A | Czech Republic | 2013 <sup>f</sup> | [80] |
| House | Tap Shower         | <i>Methylobacterium</i> spp.<br><i>M. avium</i>                                 | Biofilm: <i>Methylobacterium</i> spp.: 46% (>10 CFU/mL)<br><i>M. avium</i> : 27% (>1 CFU/mL)                 | Culture               | N/A | USA            | 2016 <sup>f</sup> | [81] |
| House | Tap                | <i>Legionella</i> spp.<br><i>Mycobacterium</i> spp.<br><i>Pseudomonas</i> spp.  | Not specified                                                                                                | Molecular             | N/A | China          | 2021 <sup>f</sup> | [82] |
| House | Water              | <i>H. pylori</i>                                                                | Water: 53.3% *                                                                                               | Culture               | N/A | India          | 2013 <sup>f</sup> | [83] |
| House | Tap                | <i>Legionella</i> spp.<br><i>Mycobacterium</i> spp.<br><i>Helicobacter</i> spp. | Water: <i>Legionella</i> spp.: 21% *<br><i>Mycobacterium</i> spp.: 35.1% *<br><i>Helicobacter</i> spp.: 7% * | Culture and molecular | N/A | USA            | 2018 <sup>f</sup> | [84] |
| House | Water storage tank | <i>Aeromonas</i> spp.<br><i>Pseudomonas</i> spp.                                | Biofilm: <i>Aeromonas</i> spp.: 77.5% *                                                                      | Culture               | N/A | Oman           | 2011 <sup>f</sup> | [85] |



|                                     |                           |                        |                                                                                                                        |                       |     |                |                   |      |
|-------------------------------------|---------------------------|------------------------|------------------------------------------------------------------------------------------------------------------------|-----------------------|-----|----------------|-------------------|------|
| <i>Pseudomonas</i> spp.:<br>97.5% * |                           |                        |                                                                                                                        |                       |     |                |                   |      |
| House                               | Bath Shower               | <i>Legionella</i> spp. | Water:<br><i>Legionella</i> spp.:<br>72.5% (5–5625 CFU/L)<br><i>L. pneumophila</i> :<br>59.5% (3.5.5–990 CFU/L)        | Culture               | N/A | Morocco        | 2013              | [86] |
| House                               | Hot water tank Tap Shower | <i>Legionella</i> spp. | Water:<br><i>Legionella</i> spp.:<br>1.5% *<br><i>L. pneumophila</i> :<br>11.5% *                                      | Culture               | N/A | USA            | 2016              | [87] |
| House                               | Shower                    | <i>Legionella</i> spp. | Water:<br>8.1% (4.0 × 10 <sup>1</sup> –1.3 × 10 <sup>4</sup> CFU/L)<br>Biofilm:<br>1.1% (5.4×10 <sup>2</sup> CFU/swab) | Culture and molecular | N/A | United Kingdom | 2017 <sup>f</sup> | [88] |
| House                               | Tap                       | <i>Legionella</i> spp. | Water:<br>20% (250–1000 CFU/L)                                                                                         | Culture               | N/A | Croatia        | 2009              | [89] |
| House                               | Hot water                 | <i>L. pneumophila</i>  | Water:<br>12.7% (500–13,000 CFU/L)                                                                                     | Culture               | N/A | Croatia        | 2011              | [90] |
| Accommodation site                  | Water                     | <i>Legionella</i> spp. | Water:<br>27.3% *                                                                                                      | Culture               | N/A | Croatia        | 2012              | [91] |
| House                               | Tap                       | <i>Legionella</i> spp. | Water:<br>Residential: 52% (10 <sup>2</sup> –10 <sup>5</sup> CFU/L)                                                    | Culture               | N/A | Italy          | 2008              | [92] |
| House                               | Shower Sprinkler          | <i>L. pneumophila</i>  | Water:<br>10% (3.0×10 <sup>2</sup> – 8.0×10 <sup>6</sup> CFU/L)                                                        | Culture               | N/A | New Zealand    | 2006              | [93] |
| House                               | Water                     | <i>Legionella</i> spp. | Water:<br>Hot water: 40% (2 × 10 <sup>2</sup> to 7.6×10 <sup>5</sup> CFU/L)                                            | Culture               | N/A | Italy          | 2019              | [94] |

|       |                |                                                      |                                                                                                           |                       |     |                |                   |       |
|-------|----------------|------------------------------------------------------|-----------------------------------------------------------------------------------------------------------|-----------------------|-----|----------------|-------------------|-------|
|       |                |                                                      | Cold water: 12% ( $1 \times 10^2$ and $1.2 \times 10^4$ CFU/L)                                            |                       |     |                |                   |       |
| House | Building inlet | <i>Legionella</i> spp.                               | Water: 23% ( $2 \times 10^2$ to $4.8 \times 10^4$ CFU/L)                                                  | Culture               | N/A | Italy          | 2017              | [95]  |
| House | Tap            | <i>L. pneumophila</i>                                | Water: Residential water linked to 3 clinical cases *                                                     | N/A                   | N/A | Italy*         | 1986              | [96]  |
| House | Water          | <i>A. hydrophila</i>                                 | Water: 27%*                                                                                               | N/A                   | N/A | Philippines    | 2013              | [97]  |
| House | Water storage  | <i>Pseudomonas</i> spp.<br><i>L. pneumophila</i>     | Water: <i>L. pneumophila</i> : 13.3% (100–800 CFU/L)<br><i>Pseudomonas</i> spp.: 86.6% (7–1000 CFU/100mL) | Culture               | N/A | United Kingdom | 2016              | [98]  |
| House | Shower         | <i>Legionella</i> spp.                               | Water: <i>Legionella</i> spp.: 73.5% (7603 copies/mL)<br><i>L. pneumophila</i> : 63.2% (4295 copies/mL)   | Molecular             | N/A | Australia      | 2018              | [99]  |
| House | Ice cube       | <i>Pseudomonas</i> spp.<br><i>Acinetobacter</i> spp. | Not specified                                                                                             | Culture               | N/A | Italy          | 2017              | [110] |
| House | Tap            | <i>L. pneumophila</i>                                | Water: 20% ( $1.0 \times 10^4$ – $2.1 \times 10^5$ CFU/L)                                                 | Culture               | N/A | Finland*       | 1999              | [119] |
| House | Tap            | <i>Legionella</i> spp.                               | Water: 10% *<br>Biofilm: 4% *                                                                             | Culture and molecular | N/A | New Zealand    | 2000 <sup>f</sup> | [120] |
| House | Shower         | <i>L. pneumophila</i>                                | Water:                                                                                                    | Culture               | N/A | Italy          | 2000              | [121] |

|       |                  |                                                                             |                                                                                                                                                                                                                       |         |     |           |                   |       |
|-------|------------------|-----------------------------------------------------------------------------|-----------------------------------------------------------------------------------------------------------------------------------------------------------------------------------------------------------------------|---------|-----|-----------|-------------------|-------|
|       | Water heater     |                                                                             | 30% hot water tanks *                                                                                                                                                                                                 |         |     |           |                   |       |
|       |                  |                                                                             | 6.2% shower *                                                                                                                                                                                                         |         |     |           |                   |       |
| House | Hot water system | <i>Legionella</i> spp.                                                      | Water:<br>12% (0 to $1 \times 10^5$ CFU/100mL)                                                                                                                                                                        | Culture | N/A | Germany   | 2003              | [124] |
| House | Tap              | <i>A. hydrophila</i><br><i>P. aeruginosa</i>                                | Water:<br><i>A. hydrophila</i> : 6.6% without POU filter (10 CFU/500mL)<br>10.5% with POU filter (29.5 CFU/500mL)<br><i>P. aeruginosa</i> : 16.6% without POU (15 CFU/500mL)<br>33.3% with POU filter (102 CFU/500mL) | Culture | N/A | USA       | 1998              | [127] |
| House | Sink             | <i>P. aeruginosa</i>                                                        | Biofilm:<br>19% ( $1 \times 10^2$ – $1.5 \times 10^5$ CFU/swab)                                                                                                                                                       | Culture | N/A | USA       | 1997 <sup>f</sup> | [128] |
| House | Tap Shower       | <i>Mycobacterium</i> spp.<br><i>Legionella</i> spp.<br><i>P. aeruginosa</i> | Water:<br><i>Mycobacterium</i> spp. Cold water: 95.4% (1–500 CFU/500mL)<br>Warm water: 15.4% 1–1000 CFU/500mL)<br><i>Legionella</i> spp.: 9.2% (50–5000 CFU/500mL)<br><i>P. aeruginosa</i> : 10.8% (5–2500 CFU/500mL) | Culture | N/A | Germany   | 2007              | [132] |
| DWDS  | Municipal water  | <i>Mycobacterium</i> spp.                                                   | Water:<br>70% *                                                                                                                                                                                                       | Culture | N/A | Australia | 2008              | [136] |

|       |               |                        |                                                                                                                                                             |                          |     |                  |                   |       |
|-------|---------------|------------------------|-------------------------------------------------------------------------------------------------------------------------------------------------------------|--------------------------|-----|------------------|-------------------|-------|
| House | Shower        | <i>Legionella</i> spp. | Water:<br>16.1% shower *<br>1 boiler tank *                                                                                                                 | Culture and<br>molecular | N/A | Brazil           | 2005              | [141] |
| House | Tap<br>Shower | <i>Legionella</i> spp. | Water:<br>32.3% negative by<br>all methods *<br>2.9% positive by all<br>methods *<br>41.2% positive by<br>PCR only *<br>23.5% positive by<br>FISH and PCR * | Culture and<br>molecular | N/A | Germany*         | 2002 <sup>f</sup> | [147] |
| House | Water         | <i>L. pneumophila</i>  | Water:<br>Residential water<br>linked to 2 clinical<br>cases (10–100<br>CFU/mL)                                                                             | Culture                  | N/A | Turkey*          | 2016 <sup>f</sup> | [155] |
| House | Shower        | <i>M. avium</i>        | Biofilm and water:<br>Residential shower<br>linked to 1 clinical<br>isolate (2–240<br>CFU/mL <sup>-1</sup> )                                                | Culture                  | N/A | USA              | 2002              | [156] |
| House | Water         | <i>L. pneumophila</i>  | Water:<br>Residential water<br>linked to 1 clinical<br>case (10 <sup>8</sup> CFU/L)                                                                         | Culture                  | N/A | Netherlands<br>* | 1993              | [157] |
| House | Shower<br>Tap | <i>Legionella</i> spp. | Water:<br>65% (1–4000<br>CFU/mL)                                                                                                                            | Culture                  | N/A | Germany          | 1993 <sup>f</sup> | [158] |
| House | Tap           | <i>L. pneumophila</i>  | Water:<br>Residential water<br>linked to 1 clinical<br>case (3 × 10 <sup>4</sup><br>CFU/L)                                                                  | Culture                  | N/A | Israel           | 2012              | [159] |
| House | Tap           | <i>L. pneumophila</i>  | Water:<br>Residential water<br>linked to 1 clinical<br>case (2.9–7.2 × 10 <sup>4</sup><br>CFU/L)                                                            | Culture                  | N/A | Korea*           | 2016              | [160] |

|           |                |                                                            |                                                                                                          |           |     |             |                   |       |
|-----------|----------------|------------------------------------------------------------|----------------------------------------------------------------------------------------------------------|-----------|-----|-------------|-------------------|-------|
| House     | Shower         | <i>L. pneumophila</i>                                      | Water:<br>Shower water<br>linked to 1 clinical<br>case ( $1.95 \times 10^4$<br>CFU/L)                    | Culture   | N/A | Switzerland | 1999              | [161] |
| House     | Shower         | <i>L. pneumophila</i>                                      | Water:<br>Shower linked to 1<br>clinical case (2.54<br>CFU/mL)                                           | Culture   | N/A | USA         | 2018              | [162] |
| House     | Tap<br>Shower  | <i>Legionella</i> spp.                                     | Water:<br>Hot water tank<br>linked to 1 clinical<br>case (400–2000<br>CFU/mL)                            | Culture   | N/A | USA*        | 1987 <sup>f</sup> | [163] |
| House     | Water          | <i>Legionella</i> spp.                                     | Water:<br>Municipal water<br>linked to 8 clinical<br>cases ( $1 \times 10^4 - 6 \times$<br>$10^5$ CFU/L) | Culture   | N/A | USA         | 1992 <sup>f</sup> | [164] |
| House     | Tap            | <i>L. pneumophila</i>                                      | Water:<br>Residential water<br>linked to 1 clinical<br>case ( $500-4.5 \times 10^4$<br>CFU/L)            | Culture   | N/A | Australia   | 2003              | [165] |
| Dormitory | Tap            | <i>Legionella</i> spp.                                     | Water:<br>50% (5-68 CFU/L)                                                                               | Culture   | N/A | Germany     | 1999              | [171] |
| House     | Water<br>meter | <i>Mycobacterium</i><br>spp.<br><i>Pseudomonas</i><br>spp. | Biofilm:<br><i>Mycobacterium</i><br>spp.: 93%*<br><i>Pseudomonas</i> spp.:<br>100%*                      | Molecular | N/A | China       | 2014              | [172] |
| House     | Tap<br>Shower  | MAC                                                        | Water:<br><i>Mycobacterium</i><br>spp.: 17%*<br>MAC: 2%*                                                 | Culture   | N/A | USA         | 1992 <sup>f</sup> | [173] |
| House     | Tap<br>Drain   | <i>P. aeruginosa</i>                                       | Biofilm:<br>Sink: 6.1%*<br>Tap: 4.7%*                                                                    | Culture   | N/A | England*    | 1972 <sup>f</sup> | [174] |

|       |                  |                                                      |                                                                                                                                                                                      |                       |     |             |                   |       |
|-------|------------------|------------------------------------------------------|--------------------------------------------------------------------------------------------------------------------------------------------------------------------------------------|-----------------------|-----|-------------|-------------------|-------|
| House | Hot water system | <i>Legionella</i> spp.                               | Water:<br>(250-10 <sup>4</sup> CFU/L)<br>Culture<br>Hot water: 6.5%<br>Mixed water: 5.6%<br>IFA<br>Hot water: 41%<br>Mixed water: 52%                                                | Culture and molecular | N/A | France      | 2006              | [175] |
| House | Tap Shower       | <i>Mycobacterium</i> spp.                            | Water:<br><i>M. chimaera</i> : 73%*<br>MAC: 19.5%*                                                                                                                                   | Culture               | N/A | USA         | 2013 <sup>f</sup> | [176] |
| House | Shower           | <i>Methylobacterium</i> spp.                         | Not specified                                                                                                                                                                        | Culture               | N/A | USA*        | 2012 <sup>f</sup> | [177] |
| House | Tap              | <i>M. avium</i>                                      | Water:<br>12.5%*                                                                                                                                                                     | Culture               | N/A | USA         | 2002 <sup>f</sup> | [178] |
| House | Shower Tap       | <i>Legionella</i> spp.                               | Water:<br>20.5%*                                                                                                                                                                     | Culture               | N/A | Netherlands | 2003              | [179] |
| House | Tap              | <i>Acinetobacter</i> spp.                            | Not specified                                                                                                                                                                        | Culture               | N/A | Portugal*   | 2009              | [180] |
| House | Tap Shower       | NTM                                                  | Water:<br>65%*                                                                                                                                                                       | Culture               | N/A | Netherlands | 2010 <sup>f</sup> | [181] |
| House | Tap              | <i>Pseudomonas</i> spp.<br><i>Acinetobacter</i> spp. | Water:<br><i>Pseudomonas</i> spp.: 2.2%*<br><i>Acinetobacter</i> spp.: 4.4%*                                                                                                         | Molecular             | N/A | Belgium     | 2013              | [182] |
| House | Tap Shower       | <i>Mycobacterium</i> spp.                            | Water:<br>Case residence:<br>Bathroom tap: 23%*<br>Kitchen tap: 23%*<br>Shower aerosol: 18%*<br>Control residence:<br>Bathroom tap: 11%*<br>Kitchen tap: 14%*<br>Shower aerosol: 6%* | Culture               | N/A | USA         | 2011              | [183] |
| House | Bath             | <i>L. pneumophila</i>                                | Water:                                                                                                                                                                               | Culture               | N/A | Japan       | 2018 <sup>f</sup> | [184] |

| Bath water linked to<br>1 clinical case* |                           |                                                                                                      |                                                                                                                                                                          |                       |     |           |                   |       |
|------------------------------------------|---------------------------|------------------------------------------------------------------------------------------------------|--------------------------------------------------------------------------------------------------------------------------------------------------------------------------|-----------------------|-----|-----------|-------------------|-------|
| House                                    | Water storage             | <i>Pseudomonas</i> spp.<br><i>Mycobacterium</i> spp.<br><i>Methylobacterium</i> spp.                 | Not specified                                                                                                                                                            | Culture               | N/A | Lebanon   | 2004 <sup>f</sup> | [185] |
| House                                    | Shower Tap                | NTM                                                                                                  | Water:<br>40% (27 to 1.7 × 10 <sup>4</sup> CFU/mL)                                                                                                                       | Molecular             | N/A | USA       | 2011              | [186] |
| House                                    | Shower Tap                | NTM                                                                                                  | Water:<br>Residential water linked to 35% of clinical cases*                                                                                                             | Culture               | N/A | Australia | 2013 <sup>f</sup> | [187] |
| House                                    | Bath                      | <i>M. avium</i>                                                                                      | Water:<br>Bath water linked to 1 clinical case*                                                                                                                          | Culture and molecular | N/A | Japan*    | 2001              | [188] |
| House                                    | Tap Shower                | <i>L. pneumophila</i>                                                                                | Water:<br>6.2%*                                                                                                                                                          | Culture               | N/A | USA       | 1992              | [189] |
| House                                    | Tap Shower Hot water tank | <i>L. pneumophila</i>                                                                                | Water:<br>6.4%*                                                                                                                                                          | Culture               | N/A | USA       | 1992 <sup>f</sup> | [190] |
| House                                    | Tap                       | <i>Legionella</i> spp.<br><i>P. aeruginosa</i><br><i>Acinetobacter</i> spp.<br><i>Aeromonas</i> spp. | Water:<br><i>Legionella</i> spp.:<br>77.5% (<200 CFU/mL)<br><i>P. aeruginosa</i> :<br>19.8%*<br><i>Acinetobacter</i> spp.:<br>13.5%*<br><i>Aeromonas</i> spp.:<br>16.2%* | Culture               | N/A | Poland    | 2007–2010         | [191] |
| House                                    | Tap Water storage         | <i>Legionella</i> spp.                                                                               | Water: 5% *                                                                                                                                                              | Culture               | N/A | Canada    | 1992              | [192] |
| House                                    | Tap Drain                 | <i>Pseudomonas</i> spp.                                                                              | Biofilm:<br>Tap: 1.2%*<br>Sink: 2%*                                                                                                                                      | Culture               | N/A | Scotland* | 1991              | [193] |

|       |                                |                                                 |                                                                                                                                                 |           |     |                |                   |       |
|-------|--------------------------------|-------------------------------------------------|-------------------------------------------------------------------------------------------------------------------------------------------------|-----------|-----|----------------|-------------------|-------|
| House | Water                          | <i>A. hydrophila</i>                            | Water:<br>64.28% *                                                                                                                              | Culture   | N/A | Saudi Arabia   | 1985              | [194] |
| House | Tap Shower                     | <i>Legionella</i> spp.                          | Water:<br>74% *                                                                                                                                 | Culture   | N/A | USA            | 2009              | [195] |
| House | Drain Tap                      | <i>Pseudomonas</i> spp.                         | Biofilm:<br>Kitchen sink: 24% *<br>Kitchen drain: 40% *<br>Bathroom sink: 21% *<br>Bath: 47% *                                                  | Culture   | N/A | USA            | 2006              | [196] |
| House | Drain Tap                      | <i>Pseudomonas</i> spp.<br><i>A. hydrophila</i> | Biofilm:<br>Drain: 2.2% *<br>Tap: 10.9% *<br>Water: 8.1% *                                                                                      | Culture   | N/A | United Kingdom | 1982 <sup>f</sup> | [197] |
| House | Tap                            | <i>Legionella</i> spp.                          | Water:<br>89.5% (5.45 CFU/mL)                                                                                                                   | Culture   | N/A | Germany        | 1999 <sup>f</sup> | [198] |
| House | Shower                         | <i>Mycobacterium</i> spp.                       | Biofilm:<br>78.5% (15 - 5.6x10 <sup>6</sup> CFU/cm <sup>2</sup> )                                                                               | Culture   | N/A | Germany        | 1992              | [199] |
| House | Tap Drain                      | <i>P. aeruginosa</i>                            | Biofilm:<br>Bath drain: 12.4% *<br>Bath tap: 14.3% *<br>Shower drain: 17.6% *<br>Showerhead: 0% *<br>Kitchen drain: 5% *<br>Kitchen tap: 4.5% * | Culture   | N/A | Belgium        | 2005              | [200] |
| House | Shower                         | <i>M. avium</i>                                 | Biofilm:<br>93% (10 <sup>2</sup> –10 <sup>10</sup> CE/L)                                                                                        | Molecular | N/A | United Kingdom | 2011              | [201] |
| House | Water heater                   | <i>Legionella</i> spp.                          | Water:<br>6.6% houses *                                                                                                                         | Culture   | N/A | USA            | 2016              | [202] |
| House | Shower Tap Drain Ice dispenser | <i>Pseudomonas</i> spp.                         | Biofilm:<br>48.6% *                                                                                                                             | Culture   | N/A | USA            | 2007              | [203] |
| House | Tap                            | <i>P. aeruginosa</i>                            | Water:                                                                                                                                          | Culture   | N/A | Germany        | 2004 <sup>f</sup> | [204] |



|       |                        |                                                      |                                                                                                                                          |           |     |                |                   |       |
|-------|------------------------|------------------------------------------------------|------------------------------------------------------------------------------------------------------------------------------------------|-----------|-----|----------------|-------------------|-------|
|       | Drain                  |                                                      | 71.6% *                                                                                                                                  |           |     |                |                   |       |
| House | Water                  | <i>Methylobacterium</i> spp.                         | Not specified                                                                                                                            | Molecular | N/A | United Kingdom | 2013 <sup>f</sup> | [205] |
| House | Dishwasher             | <i>Pseudomonas</i> spp.<br><i>Acinetobacter</i> spp. | Not specified                                                                                                                            | Molecular | N/A | Slovenia       | 2018 <sup>f</sup> | [206] |
| House | Drain                  | <i>P. aeruginosa</i>                                 | Biofilm: 28% *                                                                                                                           | Molecular | N/A | USA            | 2012              | [207] |
| House | Water                  | <i>Legionella</i> spp.                               | Water: 24.1% (3.75–415.5 CFU/mL)                                                                                                         | Culture   | N/A | USA            | 2019 <sup>f</sup> | [208] |
| House | Tap                    | <i>P. aeruginosa</i>                                 | Water: 12% (2–100 CFU/100mL)                                                                                                             | Culture   | N/A | Cyprus         | 2013              | [209] |
| House | Shower                 | <i>L. pneumophila</i>                                | Water: Residential shower linked to 1 clinical case *                                                                                    | Molecular | N/A | Italy          | 1985              | [210] |
| House | Tap                    | <i>Acinetobacter</i> spp.<br><i>P. aeruginosa</i>    | Not specified                                                                                                                            | Culture   | N/A | Nigeria        | 2008 <sup>f</sup> | [211] |
| House | Water                  | <i>Legionella</i> spp.                               | Water: 25% (10 <sup>3</sup> cells/mL)                                                                                                    | Culture   | N/A | Germany*       | 1996 <sup>f</sup> | [212] |
| House | Drain<br>Tap<br>Shower | <i>P. aeruginosa</i>                                 | Biofilm: (>1 CFU/10 cm <sup>2</sup> )<br>Kitchen tap: 7.2%<br>Kitchen sink: 12.9%<br>Drain: 27.1%<br>Bathroom faucet: 2.3%<br>Bath: 1.2% | Culture   | N/A | Japan          | 2002 <sup>f</sup> | [213] |
| House | Drain<br>Shower<br>Tap | <i>P. aeruginosa</i>                                 | Not specified                                                                                                                            | Culture   | N/A | Japan          | 1999              | [214] |
| House | Water                  | <i>Aeromonas</i> spp.                                | Water: 20% *                                                                                                                             | Culture   | N/A | South Africa   | 2006              | [215] |
| House | Tap<br>Shower<br>Drain | MAC                                                  | Biofilm: 5.4% shower *<br>4% bath drain *                                                                                                | Culture   | N/A | Japan*         | 2007 <sup>f</sup> | [216] |

|                                  |                       |                                                       |                                                                                                        |                          |     |                   |                   |       |
|----------------------------------|-----------------------|-------------------------------------------------------|--------------------------------------------------------------------------------------------------------|--------------------------|-----|-------------------|-------------------|-------|
| Water:<br>6.5% shower water<br>* |                       |                                                       |                                                                                                        |                          |     |                   |                   |       |
| 6.25% bath water *               |                       |                                                       |                                                                                                        |                          |     |                   |                   |       |
| Apartment                        | Water                 | <i>Legionella</i> spp.                                | Water:<br>42.9% (10 <sup>2</sup> –10 <sup>4</sup><br>CFU/L)                                            | Culture                  | N/A | Italy             | 2009              | [217] |
| House                            | Tap<br>Shower<br>Bath | <i>Legionella</i> spp.                                | Water:<br>36.7% (>10 <sup>2</sup><br>CFU/L)                                                            | Culture                  | N/A | Italy             | 2005              | [218] |
| House                            | Water                 | <i>Mycobacterium<br/>leprae</i>                       | Water:<br>24.2% *                                                                                      | Molecular                | N/A | India             | 2016 <sup>f</sup> | [219] |
| House                            | Water                 | <i>Aeromonas</i> spp.                                 | Water:<br>3.7% houses (5<br>CFU/mL)                                                                    | Culture                  | N/A | Japan             | 2011              | [220] |
| House                            | Drain                 | <i>P. aeruginosa</i>                                  | Biofilm:<br>100% (<4–9.52<br>log <sub>10</sub> CFU)                                                    | Culture and<br>molecular | N/A | United<br>Kingdom | 2003 <sup>f</sup> | [221] |
| House                            | Bath<br>Shower        | <i>M. avium</i>                                       | Water:<br>Residential water<br>linked to 1 clinical<br>case *                                          | Culture                  | N/A | Canada            | 2005 <sup>f</sup> | [222] |
| House                            | Water                 | <i>L. pneumophila</i>                                 | Not specified                                                                                          | Culture                  | N/A | Canada            | 2021 <sup>f</sup> | [223] |
| DWDS                             | Biofilm               | <i>Mycobacterium</i><br>spp.                          | Biofilm:<br>100% *                                                                                     | Molecular                | N/A | Sweden            | 2011              | [224] |
| House                            | Water                 | <i>Legionella</i> spp.                                | Water:<br>Residential water<br>linked to 1 clinical<br>(1–2 × 10 <sup>4</sup><br>CFU/L <sup>-1</sup> ) | Culture                  | N/A | Germany           | 2004              | [225] |
| House                            | Tap                   | <i>Aeromonas</i> spp.<br><i>Mycobacterium</i><br>spp. | Biofilm and Water:<br><i>Aeromonas</i> spp.:<br>90% *<br><i>Mycobacterium</i><br>spp.: 60% *           | Culture and<br>molecular | N/A | Netherlands       | 2017 <sup>f</sup> | [226] |
| House                            | Water<br>purifier     | <i>P. aeruginosa</i>                                  | Not reported                                                                                           | Molecular                | N/A | Germany*          | 2020 <sup>f</sup> | [227] |
| House                            | Shower                | <i>Legionella</i> spp.                                | Biofilm:                                                                                               | Molecular                | N/A | Switzerland       | 2011              | [228] |

|       |                                |                                             |                                                                                                                                                             |           |     |          |      |       |
|-------|--------------------------------|---------------------------------------------|-------------------------------------------------------------------------------------------------------------------------------------------------------------|-----------|-----|----------|------|-------|
|       |                                | <i>Mycobacterium</i> spp.                   | <i>Legionella</i> spp.: 12.5% *<br><i>Mycobacterium</i> spp.: 6.25% *<br>Water:<br><i>Legionella</i> spp.: 23% *<br><i>Mycobacterium</i> spp.: 10.4% *      |           |     |          |      |       |
| House | Tap                            | <i>Aeromonas</i> spp.                       | Water:<br><i>Aeromonas</i> spp.: 4% houses *                                                                                                                | Culture   | N/A | Canada   | 1992 | [229] |
| House | Hot water system               | <i>Legionella</i> spp. <i>P. aeruginosa</i> | Water:<br><i>Legionella</i> spp.: 30.5% (25–9.75 × 10 <sup>4</sup> CFU/L <sup>−1</sup> )<br><i>P. aeruginosa</i> : 7.1% (4–8.2 × 10 <sup>3</sup> CFU/100mL) | Culture   | N/A | Italy    | 2005 | [230] |
| House | Tap                            | <i>Mycobacterium canariasisense</i>         | Water:<br>47.4% *                                                                                                                                           | Culture   | N/A | Spain    | 2014 | [231] |
| House | Tap<br>Shower<br>Ice dispenser | <i>M. avium</i>                             | Biofilm:<br>56.8% kitchen sink tap *<br>41.7% bathroom taps *<br>37.1% shower heads *<br>37.9% shower pipes *<br>14.2% ice dispensers *                     | Culture   | N/A | USA      | 2012 | [232] |
| House | Water                          | <i>Legionella</i> spp.                      | Water:<br>47.8% (15 – 370 CFU/100 mL)<br>Biofilm:<br>18.9% *                                                                                                | Culture   | N/A | Japan    | 2014 | [233] |
| House | Tap                            | <i>P. aeruginosa</i>                        | Water:<br>12% *                                                                                                                                             | Culture   | N/A | Germany* | 2001 | [234] |
| House | Rainwater                      | <i>L. pneumophila</i>                       | Water                                                                                                                                                       | Molecular | N/A | USA      | 2013 | [235] |

|       |                         |                                                        |                                                                                                                                                                                                                                                                                                                                                                                                                                                       |           |     |            |                   |       |
|-------|-------------------------|--------------------------------------------------------|-------------------------------------------------------------------------------------------------------------------------------------------------------------------------------------------------------------------------------------------------------------------------------------------------------------------------------------------------------------------------------------------------------------------------------------------------------|-----------|-----|------------|-------------------|-------|
|       |                         | <i>M. avium</i>                                        | <i>L. pneumophila</i> :<br>8.7% (2.9 log <sub>10</sub><br>genomic targets/L)<br><i>M. avium</i> : 30% (3.9<br>log <sub>10</sub> genomic<br>targets/L)                                                                                                                                                                                                                                                                                                 |           |     |            |                   |       |
| House | Tap                     | <i>L. pneumophila</i>                                  | Water: 1.9% *                                                                                                                                                                                                                                                                                                                                                                                                                                         | Culture   | N/A | England    | 1987 <sup>f</sup> | [236] |
| House | Hot water<br>heater     | <i>L. pneumophila</i>                                  | Water:<br>Electric heater: 30%<br>*<br>Oil/gas heater: 6% *                                                                                                                                                                                                                                                                                                                                                                                           | Culture   | N/A | Canada     | 1985 <sup>f</sup> | [237] |
| House | Tap<br>Shower           | <i>L. pneumophila</i>                                  | Water:<br>Tap: 1 isolate *                                                                                                                                                                                                                                                                                                                                                                                                                            | Molecular | N/A | China      | 2014              | [238] |
| House | Rainwater               | <i>Pseudomonas</i><br>spp.                             | Water:<br>Dry season: 9% *<br>Wet season: 91% *                                                                                                                                                                                                                                                                                                                                                                                                       | Culture   | N/A | Bangladesh | 2009              | [239] |
| House | Bath                    | <i>L. pneumophila</i>                                  | Water:<br>Bath water linked to<br>1 clinical case *                                                                                                                                                                                                                                                                                                                                                                                                   | Culture   | N/A | Japan*     | 2012 <sup>f</sup> | [240] |
| House | Water                   | <i>Legionella</i> spp.<br><i>Mycobacterium</i><br>spp. | Water:<br><i>Legionella</i> spp.:<br>72% *<br><i>Mycobacterium</i><br>spp.: 67% *                                                                                                                                                                                                                                                                                                                                                                     | Molecular | N/A | USA        | 2020 <sup>f</sup> | [241] |
| House | Drain<br>Bath<br>Shower | <i>Mycobacterium</i><br>spp.                           | Biofilm:<br>96.5% drains (<10 <sup>1</sup><br>– 10 <sup>7</sup> cells/cm <sup>2</sup> )<br>44.4% baths (<10 <sup>1</sup> –<br>10 <sup>7</sup> cells/cm <sup>2</sup> )<br>48.7% kitchen<br>drains (<10 <sup>1</sup> – 10 <sup>7</sup><br>cells/cm <sup>2</sup> )<br>13% inner shower<br>head (<10 <sup>1</sup> – 10 <sup>5</sup><br>cells/cm <sup>2</sup> )<br>2.5% outer<br>showerhead (<10 <sup>1</sup> –<br>10 <sup>2</sup> cells/cm <sup>2</sup> ) | Molecular | N/A | Japan      | 2014 <sup>f</sup> | [242] |
| House | Shower                  | <i>M. avium</i>                                        | Water:                                                                                                                                                                                                                                                                                                                                                                                                                                                | Culture   | N/A | USA        | 2016              | [243] |

|       |                        |                                                      |                                                                                                          |           |     |          |                   |       |
|-------|------------------------|------------------------------------------------------|----------------------------------------------------------------------------------------------------------|-----------|-----|----------|-------------------|-------|
|       |                        |                                                      | 11% *                                                                                                    |           |     |          |                   |       |
| House | Tap                    | <i>Methylobacterium</i> spp.                         | Water:<br>12% *                                                                                          | Molecular | N/A | USA      | 2015 <sup>f</sup> | [244] |
| House | Tap<br>Shower<br>Drain | NTM                                                  | Biofilm:<br>Showerhead: 69% *<br>Kitchen: 59% *<br>Bathroom: 67% *                                       | Molecular | N/A | USA      | 2013              | [245] |
| House | Shower                 | NTM                                                  | Water:<br>Shower water<br>linked to 1 clinical<br>case *                                                 | Culture   | N/A | USA*     | 2011 <sup>f</sup> | [246] |
| House | Tap                    | NTM<br><i>P. aeruginosa</i><br><i>S. maltophilia</i> | Biofilm & water:<br>NTM: 100% *<br><i>P. aeruginosa</i> :<br>100% *<br><i>S. maltophilia</i> :<br>100% * | Molecular | N/A | USA      | 2016              | [247] |
| House | Tap                    | NTM                                                  | Water:<br>100% *                                                                                         | Molecular | N/A | USA      | 2016              | [248] |
| House | Tap<br>Shower          | MAC                                                  | Water:<br>NTM: 93% houses<br>MAC: 21% houses<br>(1- $1 \times 10^3$<br>CFU/500 <sup>-1</sup> mL)         | Culture   | N/A | USA      | 1994 <sup>f</sup> | [249] |
| House | Spa<br>Shower<br>Tap   | <i>P. aeruginosa</i>                                 | Water:<br>18.2% (100–500<br>CFU/250mL)                                                                   | Culture   | N/A | Italy*   | 2009              | [250] |
| House | Shower                 | <i>Mycobacterium</i> spp.                            | Biofilm:<br>13.5% *                                                                                      | Molecular | N/A | USA      | 2016              | [251] |
| House | Tap                    | <i>L. pneumophila</i>                                | Water:<br>6% *                                                                                           | Culture   | N/A | USA      | 2016              | [252] |
| House | Water                  | <i>Mycobacterium</i> spp.                            | Water:<br>81.9% ( $10^2$ – $10^3$<br>CFU/L)                                                              | Culture   | N/A | Germany  | 1991 <sup>f</sup> | [253] |
| House | Water                  | <i>A. baumannii</i><br><i>P. aeruginosa</i>          | Water:<br><i>A. baumannii</i> : 80%<br>*<br><i>P. aeruginosa</i> : 85%<br>*                              | Culture   | N/A | Pakistan | 2004              | [254] |

|       |                           |                                                |                                                                                                                       |                       |     |                |                   |       |
|-------|---------------------------|------------------------------------------------|-----------------------------------------------------------------------------------------------------------------------|-----------------------|-----|----------------|-------------------|-------|
| House | Tap Shower                | NTM                                            | Biofilm: 28% *<br>Water: 24% *                                                                                        | Culture               | N/A | USA            | 2011 <sup>f</sup> | [255] |
| House | Spa Garden hose           | <i>Legionella</i> spp.                         | Water:<br>Spa and garden hose linked to 3 clinical isolates *                                                         | Culture               | N/A | Netherlands    | 2009              | [256] |
| House | Water                     | <i>P. aeruginosa</i>                           | Water:<br>Bathroom linked to one clinical case *                                                                      | Molecular             | N/A | Japan*         | 2013 <sup>f</sup> | [257] |
| House | Tap Shower Hot water tank | <i>L. pneumophila</i>                          | Water:<br>33% houses<br>Residential water linked to 14% of clinical cases *                                           | Culture               | N/A | Canada         | 2012 <sup>f</sup> | [258] |
| House | Water                     | NTM                                            | Water:<br>11.2% *                                                                                                     | Culture               | N/A | Greece         | 2013              | [259] |
| House | Tap                       | <i>L. pneumophila</i>                          | Water:<br>28.6% ( $>1 \times 10^4$ CFU/L)                                                                             | Culture and molecular | N/A | USA            | 2010              | [260] |
| House | Water                     | <i>Legionella</i> spp.<br><i>P. aeruginosa</i> | Water:<br><i>Legionella</i> spp.:<br>30% (200–2650 CFU/L <sup>-1</sup> )<br><i>P. aeruginosa</i> : 50% (<1 CFU/100mL) | Culture               | N/A | Italy*         | 2015 <sup>f</sup> | [261] |
| DWDS  | Municipal water           | <i>Mycobacterium mucogenicum</i>               | Water:<br>Incoming municipal water linked to one clinical case*                                                       | Culture               | N/A | Canada*        | 2017 <sup>f</sup> | [262] |
| House | Water                     | <i>L. pneumophila</i>                          | Water:<br>Hot water tank:<br>33% (1–100 CFU/mL)<br>Bath: 4% (<50 CFU/mL)<br>Biofilm:<br>40.9% *                       | Culture               | N/A | Canada         | 1984              | [263] |
| House | Shower Tap Drain          | <i>Stenotrophomonas maltophilia</i>            | Biofilm:<br>Tap: 36.3%*<br>Drain: 72%*                                                                                | Culture               | N/A | United Kingdom | 1996              | [264] |

|          |                    |                                              |                                                                                                                                                         |                          |     |                   |                   |       |
|----------|--------------------|----------------------------------------------|---------------------------------------------------------------------------------------------------------------------------------------------------------|--------------------------|-----|-------------------|-------------------|-------|
| House    | Water              | <i>P. aeruginosa</i>                         | Water:<br>89.5% (4–130<br>CFU/100mL)                                                                                                                    | Culture                  | N/A | Mexico*           | 2001 <sup>f</sup> | [265] |
| House    | Shower<br>head     | <i>Mycobacterium</i><br>spp.                 | Biofilm:<br>100%*                                                                                                                                       | Molecular                | N/A | Singapore         | 2020 <sup>f</sup> | [266] |
| House    | Shower             | <i>L. pneumophila</i>                        | Water: continuously<br>detected for 2.5 yrs<br>(380–600 CFU/L)                                                                                          | Culture                  | N/A | United<br>Kingdom | 2005              | [267] |
| Building | Tap                | <i>L. pneumophila</i>                        | Water:<br>2.4% ( $2 \times 10^2$ to<br>$3 \times 10^4$ CFU/L)                                                                                           | Culture                  | N/A | England           | 1986              | [268] |
| DWDS     | Municipal<br>water | <i>L. pneumophila</i>                        | Water:<br>25% of pre flush*<br>50% flushed (1–<br>2100 CFU/25·2mL)                                                                                      | Culture                  | N/A | USA               | 2011              | [269] |
| House    | Water              | <i>Legionella</i> spp.                       | Water:<br>8% patient houses<br>( $1.3 \times 10^2$ to $2.7 \times 10^4$ CFU/L)<br>19% control houses<br>( $2.3 \times 10^2$ to $5.5 \times 10^4$ CFU/L) | Culture and<br>molecular | N/A | Spain             | 2000              | [270] |
| House    | Tap                | <i>P. aeruginosa</i>                         | Not specified                                                                                                                                           | Culture                  | N/A | India             | 2012              | [271] |
| House    | Tap                | <i>L. pneumophila</i>                        | Water:<br>Residential water<br>linked to 1 clinical<br>case *                                                                                           | Culture                  | N/A | China*            | 2002 <sup>f</sup> | [272] |
| House    | Tap                | <i>Methylobacterium</i><br>spp.              | Not specified                                                                                                                                           | Culture                  | N/A | Norway            | 2019 <sup>f</sup> | [273] |
| House    | Tap                | <i>A. hydrophila</i><br><i>P. aeruginosa</i> | Water:<br><i>P. aeruginosa</i> :<br>100% sites *<br><i>A. hydrophila</i> : 33%<br>sites *                                                               | Molecular                | N/A | India             | 2013              | [274] |
| House    | Water              | <i>P. aeruginosa</i>                         | Water: 15% (1–975<br>CFU/100mL)                                                                                                                         | Culture                  | N/A | Mexico            | 2004              | [275] |
| House    | Rainwater          | <i>P. aeruginosa</i>                         | Water: 28% (1–100<br>CFU/100mL)                                                                                                                         | Culture                  | N/A | Mexico            | 1999 <sup>f</sup> | [276] |

|       |               |                                                                                              |                                                                                                                                                    |           |     |                 |                   |       |
|-------|---------------|----------------------------------------------------------------------------------------------|----------------------------------------------------------------------------------------------------------------------------------------------------|-----------|-----|-----------------|-------------------|-------|
| House | Tap           | <i>Helicobacter pylori</i>                                                                   | Water:<br>12.2% *                                                                                                                                  | Molecular | N/A | Peru            | 2017              | [277] |
| House | Water         | <i>Aeromonas</i> spp.                                                                        | Water:<br>33.3% *                                                                                                                                  | Culture   | N/A | Australia       | 1984 <sup>f</sup> | [278] |
| House | Shower        | <i>L. pneumophila</i>                                                                        | Water:<br>19.6% *( $5 \times 10^1$ –<br>$26.6 \times 10^3$<br>CFU/mL)<br>Biofilm:<br>6.5% ( $2.9 \times 10^3$ –<br>$28.6 \times 10^3$<br>CFU/mL)   | Culture   | N/A | Turkey          | 2009 <sup>f</sup> | [279] |
| House | Water         | <i>Legionella</i> spp.                                                                       | Water:<br>Residential water<br>linked to 28 clinical<br>cases *                                                                                    | Culture   | N/A | Germany         | 2016–<br>2019     | [280] |
| House | Water         | NTM                                                                                          | Water:<br>60% (300 CFU/L)                                                                                                                          | Culture   | N/A | Italy           | 2010 <sup>f</sup> | [281] |
| House | Shower<br>Tap | <i>Legionella</i> spp.<br><i>Pseudomonas</i><br>spp.                                         | Water:<br><i>Pseudomonas</i> spp.:<br>38.4% (1 to $6.4 \times 10^4$ CFU/100mL)<br><i>Legionella</i> spp.:<br>22.6% (25 to $8.7 \times 10^4$ CFU/L) | Culture   | N/A | Italy           | 2002              | [282] |
| House | Tap           | <i>Acinetobacter</i><br>spp.<br><i>Aeromonas</i> spp.<br><i>P. aeruginosa</i>                | Water:<br><i>Aeromonas</i> spp.:<br>12% *<br><i>Acinetobacter</i> spp.:<br>1–8% *<br><i>P. aeruginosa</i> : 6–<br>40% *                            | Culture   | N/A | Pakistan        | 1991 <sup>f</sup> | [283] |
| House | Tap           | <i>A. baumannii</i>                                                                          | Not specified                                                                                                                                      | qPCR      | N/A | Cameroon        | 2014              | [284] |
| House | Water         | <i>Aeromonas</i> spp.<br><i>Legionella</i> spp.<br><i>Pseudomonas</i><br><i>fluorescence</i> | Not specified                                                                                                                                      | Culture   | N/A | South<br>Africa | 1995 <sup>f</sup> | [285] |
| House | Water         | <i>Mycobacterium</i><br>spp.                                                                 | Water:                                                                                                                                             | Culture   | N/A | USA             | 1996              | [286] |



|       |                         |                                                      |                                                                                                                                                                             |                                |     |                      |                   |       |
|-------|-------------------------|------------------------------------------------------|-----------------------------------------------------------------------------------------------------------------------------------------------------------------------------|--------------------------------|-----|----------------------|-------------------|-------|
|       |                         |                                                      | NTM: 82% house water*<br>MAC: 22% house water (1–10 <sup>3</sup> CFU/500mL)<br><i>M. avium</i> : 5% house water*<br><i>Mycobacterium intracellulare</i> : 13% house water * |                                |     |                      |                   |       |
| House | Hot water system Tap    | <i>L. pneumophila</i>                                | Water: (1–10 <sup>4</sup> CFU/L)<br>32% hot water<br>Biofilm: 100% tap *                                                                                                    | Culture                        | N/A | USA                  | 1982              | [287] |
| House | Shower Bath             | <i>Mycobacterium avium</i> subsp. <i>hominissuis</i> | Biofilm: 33.3% of bath inlet *<br>4% drain Water: 5.4% of shower *                                                                                                          | Culture                        | N/A | Japan                | 2019              | [288] |
| House | Tap                     | <i>P. aeruginosa</i>                                 | Water: 23.3% *                                                                                                                                                              | Culture                        | N/A | United Arab Emirates | 2015              | [289] |
| House | Tap Water heater Shower | <i>L. pneumophila</i>                                | Biofilm: 11.9% shower heads *<br>Water: 17.7% hot water heaters *<br>19.4% taps *<br>23% shower heads *                                                                     | Culture and Immunofluorescence | N/A | Canada*              | 1989              | [290] |
| House | Water heater Tap Shower | <i>Legionella</i> spp.                               | Water: 37% hot water heaters *<br>15% showers *<br>12% taps *                                                                                                               | Culture                        | N/A | Canada               | 1991 <sup>f</sup> | [291] |

<sup>a</sup> Abbreviations: *Mycobacterium avium* complex, MAC; Non-tuberculous mycobacteria, NTM .

*b* Abbreviations: Fluorescence in situ hybridization, FISH; Immunofluorescence assay, IFA; Polymerase chain reaction, PCR; Point of use, POU; Colony forming unit, CFU. Where the concentration of pathogen was not specified in the article, it was denoted with an asterisk (\*).

*c* Abbreviations: Quantitative polymerase chain reaction, qPCR; drinking water distribution systems (DWDS).

*d* Abbreviations: Amoxicillin- clavulanic acid, AMC; Ampicillin, AMP; Amoxicillin, AMX; Aztreonam, ATM; Azithromycin, AZM; Ceftazidime, CAZ; Cephalothin, CEF; Cefazolin, CFZ; Chloramphenicol, CHL; Ciprofloxacin, CIP; Cloxacillin, CLOXA; Clarithromycin, CLR; Colistin, COL; Co-trimoxazole, COT; Ceftriaxone, CRO; Cefotaxime, CTX; Doxycycline, DOX; Erythromycin, ERY; Cefoxitin, FOX; Gentamicin, GEN; Imipenem, IPM; Levofloxacin, LVX; Multidrug resistant, MDR; Meropenem, MEM; Minimum inhibitory concentration, MIC; Minocycline, MIN; Moxifloxacin, MXF; Nalidixic acid, NAL; Netilmicin, NET; Penicillin, PEN; Piperacillin, PIP; Polymyxin B, PMB; Resistant, R; Rifampin, RIF; Streptomycin, STR; Trimethoprim-sulfamethoxazole, SXT; Tetracycline, TET; Tigecycline, TGC; Ticarcillin, TIC; Tobramycin, TOB; BioMerieux identification and antibiotic susceptibility testing instrument, VITEK-2; Not applicable, N/A; <sup>R</sup>, Antimicrobial resistance; <sup>S</sup>, Antimicrobial sensitivity; <sup>I</sup>, Intermediate antimicrobial resistance.

*e* In countries where the study location was not specified in the article, it was assumed that the country of origin was denoted by the country of the authors.

*f* Where the year of study was not specified in the article, it was assumed that the year of research was denoted by the year of publication.

## References

9. Moore, M.R.; Pryor, M.; Fields, B.; Lucas, C.; Phelan, M.; Besser, R.E. Introduction of monochloramine into a municipal water system: Impact on colonization of buildings by *Legionella* spp. *Applied and Environmental Microbiology* **2006**, *72*, 378–383, doi:10.1128/aem.72.1.378-383.2006.
30. Gattlen, J.; Amberg, C.; Zinn, M.; Mauclair, L. Biofilms isolated from washing machines from three continents and their tolerance to a standard detergent. *Biofouling* **2010**, *26*, 873–882, doi:10.1080/08927014.2010.524297.
31. Oxford, J.; Berezin, E.N.; Courvalin, P.; Dwyer, D.; Exner, M.; Jana, L.A.; Kaku, M.; Lee, C.; Letlape, K.; Low, D.E., et al. An international survey of bacterial contamination and householders' knowledge, attitudes and perceptions of hygiene. *Journal of Infection Prevention* **2013**, *14*, 132–138, doi:10.1177/1757177413483346.
32. Ristola, M.; Arbeit, R.D.; Von Reyn, C.F.; Horsburgh, C.R. Isolation of *Mycobacterium avium* from potable water in homes and institutions of patients with HIV infection in Finland and the United States. *BioMed Research International* **2015**, *2015*, 1–3, doi:10.1155/2015/713845.
33. Abubakar, A.A.; Pukuma, M.S.; Abdulazeez, F.B. Frequency of biofilm formation in toothbrushes and wash basin junks. *Annals of Tropical Medicine and Public Health* **2013**, *6*, 55–58, doi:10.4103/1755-6783.115198.
34. Ahmadrabi, R.; Shakibaie, M.R.; Iranmanesh, Z.; Mollaei, H.R.; Sobhanipoor, M.H. Prevalence of mip virulence gene and PCR-base sequence typing of *Legionella pneumophila* from cooling water systems of two cities in Iran. *Virulence* **2016**, *7*, 602–609, doi:10.1080/21505594.2016.1170944.
35. Barna, Z.; Kadar, M.; Kalman, E.; Szax, A.S.; Vargha, M. Prevalence of *Legionella* in premise plumbing in Hungary. *Water Research* **2016**, *90*, 71–78, doi:10.1016/j.watres.2015.12.004.
36. Donohue, M.J.; King, D.; Pfaller, S.; Mistry, J.H. The sporadic nature of *Legionella pneumophila*, *Legionella pneumophila* Sg1 and *Mycobacterium avium* occurrence within residences and office buildings across 36 states in the United States. *Journal of Applied Microbiology* **2019**, *126*, 1568–1579, doi:10.1111/jam.14196.
37. Kobayashi, M.; Oana, K.; Kawakami, Y. Bath water contamination with *Legionella* and nontuberculous mycobacteria in 24-hour home baths, hot springs, and public bathhouses of nagano prefecture, Japan. *Japanese Journal of Infectious Diseases* **2014**, *67*, 276–281, doi:10.7883/yoken.67.276.
38. Mathias, A.J.; Sumitha, B.; Deepa, K.V.; Ramya, C.; Deepashree, G.H.M.; Smitha. Bacterial contamination of drinking water supplies to residential and workplaces of Bangalore. *Ecology, Environment and Conservation* **2007**, *13*, 123–128.
39. Prevost, M.; Rompre, A.; Baribeau, H.; Coallier, J.; Lafrance, P. Service lines: their effect on microbiological quality. *Journal American Water Works Association* **1997**, *89*, 78–91, doi:https://doi.org/10.1002/j.1551-8833.1997.tb08261.x.
40. Rakić, A.; Perić, J.; Štambuk-Giljanović, N.; Mikrut, A.; Bakavić, A.S. *Legionella* species in year-round vs. seasonal accommodation water supply systems. *Archives of Industrial Hygiene and Toxicology* **2011**, *62*, 335–340, doi:10.2478/10004-1254-62-2011-2111.
41. Sanden, G.N.; Morrill, W.E.; Fields, B.S.; Breiman, R.F.; Barbaree, J.M. Incubation of water samples containing amoebae improves detection of *Legionellae* by the culture method. *Applied and Environmental Microbiology* **1992**, *58*, 2001–2004, doi:10.1128/aem.58.6.2001-2004.1992.

42. Watson, C.L.; Owen, R.J.; Said, B.; Lai, S.; Lee, J.V.; Surman-Lee, S.; Nichols, G. Detection of *Helicobacter pylori* by PCR but not culture in water and biofilm samples from drinking water distribution systems in England. *Journal of Applied Microbiology* **2004**, *97*, 690–698, doi:10.1111/j.1365-2672.2004.02360.x.
43. Briancesco, R.; Semproni, M.; Paradiso, R.; Bonadonna, L. Nontuberculous mycobacteria: an emerging risk in engineered environmental habitats. *Annals of Microbiology* **2014**, *64*, 735–740, doi:10.1007/s13213-013-0708-8.
44. Abdel Haleem, A.A.; Hemida, S.K.; Abdellatif, M.M. Evaluation of microorganisms of drinking water of Rafha City, northern borders, Saudi Arabia. *Journal of Pure and Applied Microbiology* **2016**, *10*, 61–71, doi:10.4172/2157-7099.1000417.
45. Dai, D.J.; Rhoads, W.J.; Katner, A.; Strom, L.; Edwards, M.A.; Pruden, A.; Pieper, K.J. Molecular survey of *Legionella* and *Naegleria fowleri* in private well water and premise plumbing following the 2016 Louisiana flood. *Environmental Science-Water Research & Technology* **2019**, *5*, 1464–1477, doi:10.1039/c9ew00109c.
46. Hultén, K.; Enroth, H.; Nyström, T.; Engstrand, L. Presence of *Helicobacter* species DNA in Swedish water. *Journal of Applied Microbiology* **1998**, *85*, 282–286, doi:10.1046/j.1365-2672.1998.00500.x.
47. Katz, M.J.; Parrish, N.M.; Belani, A.; Shah, M. Recurrent *Aeromonas* bacteremia due to contaminated well water. *Open Forum Infectious Diseases* **2015**, *2*, ofv142, doi:10.1093/ofid/ofv142.
48. Mapili, K.; Pieper, K.J.; Dai, D.; Pruden, A.; Edwards, M.A.; Tang, M.; Rhoads, W.J. *Legionella pneumophila* occurrence in drinking water supplied by private wells. *Letters in Applied Microbiology* **2020**, *70*, 232–240, doi:10.1111/lam.13273.
49. Mukhopadhyay, C.; Vishwanath, S.; Eshwara, V.K.; Shankaranarayana, S.A.; Sagir, A. Microbial quality of well water from rural and urban households in Karnataka, India: A cross-sectional study. *Journal of Infection and Public Health* **2012**, *5*, 257–262, doi:10.1016/j.jiph.2012.03.004.
50. Oluyeye, J.O.; Koko, A.E.; Aregbesola, O.A. Bacteriological and physico-chemical quality assessment of household drinking water in Ado-Ekiti, Nigeria. *Water Science and Technology: Water Supply* **2011**, *11*, 79–84, doi:10.2166/ws.2011.011.
51. Xue, J.; Zhang, B.W.; Lamori, J.; Shah, K.; Zabaleta, J.; Garai, J.; Taylor, C.M.; Sherchan, S.P. Molecular detection of opportunistic pathogens and insights into microbial diversity in private well water and premise plumbing. *Journal of Water and Health* **2020**, *18*, 820–834, doi:10.2166/wh.2020.271.
52. Laverdière, M.; Joly, J.R.; Habel, F.; Bernier, F.; Riendeau, G.A.; DeCarolus, E. A sporadic community-acquired legionnaires disease linked to a domestic hot water supply: Report of a documented case. *Infectious Diseases in Clinical Practice* **2001**, *10*, 441–443, doi:10.1097/00019048-200111000-00007.
53. Abera, B.; Kibret, M.; Goshu, G.; Yimer, M. Bacterial quality of drinking water sources and antimicrobial resistance profile of Enterobacteriaceae in Bahir Dar city, Ethiopia. *Journal of Water Sanitation and Hygiene for Development* **2014**, *4*, 384–390, doi:10.2166/washdev.2014.105.
54. Adday, A.O.; Althahab, A.; Alwash, M.S. Assessment of the antibiotic susceptibility and minimum inhibition concentration of *Legionella pneumophila* isolated from different sources in Babylon Province. *Plant Archives* **2019**, *19*, 1107–1110, doi:10.13140/RG.2.2.35423.00162.
55. Koksall, F.; Oguzkurt, N.; Samasti, M.; Altas, K. Prevalence and antimicrobial resistance patterns of *Aeromonas* strains isolated from drinking water samples in Istanbul, Turkey. *Chemotherapy* **2007**, *53*, 30–35, doi:10.1159/000098248.
56. Mombini, S.; Rezatofighi, S.E.; Kiyani, L.; Motamedi, H. Diversity and metallo- $\beta$ -lactamase-producing genes in *Pseudomonas aeruginosa* strains isolated from filters of household water treatment systems. *Journal of Environmental Management* **2019**, *231*, 413–418, doi:10.1016/j.jenvman.2018.10.068.
57. Obi, C.L.; Ramalivhana, J.; Momba, M.N.B.; Onobolu, B.; Igumbor, J.O.; Lukoto, M.; Mulaudzi, T.B.; Bessong, P.O.; Jansen Van Rensburg, E.L.; Green, E., et al. Antibiotic resistance profiles and relatedness of enteric bacterial pathogens isolated from HIV/AIDS patients with and without diarrhoea and their household drinking water in rural communities in Limpopo Province South Africa. *African Journal of Biotechnology* **2007**, *6*, 1035–1047.
58. Schiavano, G.F.; Carloni, E.; Andreoni, F.; Magi, S.; Chironna, M.; Brandi, G.; Amagliani, G. Prevalence and antibiotic resistance of *Pseudomonas aeruginosa* in water samples in central Italy and molecular characterization of *oprD* in imipenem resistant isolates. *PLoS ONE* **2017**, *12*, doi:10.1371/journal.pone.0189172.
59. Samie, A.; Mashao, M.B.; Bessong, P.O.; Nkgau, T.F.; Momba, M.N.B.; Obi, C.L. Diversity and antibiograms of bacterial organisms isolated from samples of household drinking-water consumed by HIV-positive individuals in rural settings, South Africa. *Journal of Health, Population and Nutrition* **2012**, *30*, 241–249, doi:10.3329/jhpn.v30i3.12286.
60. Zupančič, J.; Turk, M.; Črnigoj, M.; Ambrožič Avguštin, J.; Gunde-Cimerman, N. The dishwasher rubber seal acts as a reservoir of bacteria in the home environment. *BMC Microbiology* **2019**, *19*, doi:10.1186/s12866-019-1674-5.

61. Lucassen, R.; Rehberg, L.; Heyden, M.; Bockmuhl, D. Strong correlation of total phenotypic resistance of samples from household environments and the prevalence of class 1 integrons suggests for the use of the relative prevalence of intI1 as a screening tool for multi-resistance. *Plos One* **2019**, *14*, doi:10.1371/journal.pone.0218277.
62. Maki, A.A. A study of bacterial contamination in different places in house kitchens. *Pollution Research* **2019**, *38*, 862-869.
63. Ma, L.P.; Li, B.; Zhang, T. New insights into antibiotic resistome in drinking water and management perspectives: A metagenomic based study of small-sized microbes. *Water Research* **2019**, *152*, 191-201, doi:10.1016/j.watres.2018.12.069.
64. Schages, L.; Lucassen, R.; Wichern, F.; Kalscheuer, R.; Bockmuhl, D. The household resistome: Frequency of beta-Lactamases, class 1 integrons, and antibiotic-resistant bacteria in the domestic environment and their reduction during automated dishwashing and laundering. *Applied and Environmental Microbiology* **2020**, *86*, 2020-2062, doi:10.1128/aem.02062-20.
65. Alavandi, S.V.; Subashini, M.S.; Ananthan, S. Occurrence of haemolytic and cytotoxic *Aeromonas* species in domestic water supplies in Chennai. *Indian Journal of Medical Research* **1999**, *110*, 50-55.
66. Huminer, D.; Shmuely, H.; Block, C.; Pitlik, S.D. Home shower-bath *Pseudomonas* folliculitis. *Israel Journal of Medical Sciences* **1989**, *25*, 44-45.
67. Watando, A.; Toyota, E.; Mori, N.; Kaneko, A.; Kuratsuji, T.; Kirikae, T.; Kudo, K. Pulmonary *Mycobacterium avium* infection in an immunocompetent young adult related to use of home bath with a circulating water system. *Japanese Journal of Infectious Diseases* **2001**, *54*, 151-152.
68. Botsaris, G.; Kanetis, L.; Slany, M.; Parpouna, C.; Makris, K.C. Microbial quality and molecular identification of cultivable microorganisms isolated from an urban drinking water distribution system (Limassol, Cyprus). *Environmental Monitoring and Assessment* **2015**, *187*, 4957-4959, doi:10.1007/s10661-015-4957-9.
69. Gora, S.L.; Soucie, T.A.; McCormick, N.E.; Ontiveros, C.C.; L'Herauld, V.; Gavin, M.; Trueman, B.F.; Campbell, J.; Stoddart, A.K.; Gagnon, G.A. Microbiological water quality in a decentralized Arctic drinking water system. *Environmental Science-Water Research & Technology* **2020**, *6*, 1855-1868, doi:10.1039/d0ew00019a.
70. Huerta, M.; Castel, H.; Grotto, I.; Shpilberg, O.; Alkan, M.; Harman-Boehm, I. Clinical and epidemiologic investigation of two *Legionella-Rickettsia* co-infections. *Israel Medical Association Journal* **2003**, *5*, 560-563.
71. Payment, P. Bacterial colonization of domestic reverse-osmosis water filtration units. *Canadian Journal of Microbiology* **1989**, *35*, 1065-1067, doi:10.1139/m89-178.
72. Bullin, C.H.; Tanner, E.I.; Collins, C.H. Isolation of *Mycobacterium xenopi* from water taps. *Journal of Hygiene* **1970**, *68*, 97-100, doi:10.1017/S0022172400028540.
73. Kaustova, J.; Charvat, B.; Mudra, R.; Holendova, E. Ostrava - A new endemic focus of *Mycobacteria xenopi* in the Czech Republic. *Central European Journal of Public Health* **1993**, *1*, 35-37.
74. Marciano-Cabral, F.; Jamerson, M.; Kaneshiro, E.S. Free-living amoebae, *Legionella* and *Mycobacterium* in tap water supplied by a municipal drinking water utility in the USA. *Journal of Water and Health* **2010**, *8*, 71-82, doi:10.2166/wh.2009.129.
75. Parashar, D.; Das, R.; Chauhan, D.S.; Sharma, V.D.; Lavania, M.; Yadav, V.S.; Chauhan, S.V.S.; Katoch, V.M. Identification of environmental mycobacteria isolated from Agra, north India by conventional & molecular approaches. *Indian Journal of Medical Research* **2009**, *129*, 424-431.
76. Perez-Martinez, I.; Aguilar-Ayala, D.A.; Fernandez-Rendon, E.; Carrillo-Sanchez, A.K.; Helguera-Repetto, A.C.; Rivera-Gutierrez, S.; Estrada-Garcia, T.; Cerna-Cortes, J.F.; Gonzalez-Y-Merchand, J.A. Occurrence of potentially pathogenic nontuberculous mycobacteria in Mexican household potable water: A pilot study. *BMC Research Notes* **2013**, *6*, doi:10.1186/1756-0500-6-531.
77. Peters, M.; Müller, C.; Rüscher-Gerdes, S.; Seidel, C.; Göbel, U.; Pohle, H.D.; Ruf, B. Isolation of atypical mycobacteria from tap water in hospitals and homes: Is this a possible source of disseminated MAC infection in AIDS patients? *Journal of Infection* **1995**, *31*, 39-44, doi:10.1016/S0163-4453(95)91333-5.
78. Slosarek, M.; Kubin, M.; Pokorny, J. Water is a possible factor of transmission in mycobacterial infections. *Central European Journal of Public Health* **1994**, *2*, 103-105.
79. Slosarek, M.; Kubin, M.; Jaresova, M. Water-borne household infections due to *Mycobacterium xenopi*. *Central European Journal of Public Health* **1993**, *1*, 78-80.
80. Klanicova, B.; Seda, J.; Slana, I.; Slany, M.; Pavlik, I. The tracing of *Mycobacteria* in drinking water supply systems by culture, conventional, and real time PCRs. *Current Microbiology* **2013**, *67*, 725-731, doi:10.1007/s00284-013-0427-1.
81. Falkinham, J.F., III; Williams, M.D.; Kwait, R.; Lande, L. *Methylobacterium* spp. as an indicator for the presence or absence of *Mycobacterium* spp. *International Journal of Mycobacteriology* **2016**, *5*, 240-243, doi:10.1016/j.ijmyco.2016.03.001.
82. Zhang, H.; Xu, L.; Huang, T.; Liu, X.; Miao, Y.; Liu, K.; Qian, X. Indoor heating triggers bacterial ecological links with tap water stagnation during winter: Novel insights into bacterial abundance, community metabolic activity and interactions. *Environmental Pollution* **2021**, *269*, doi:10.1016/j.envpol.2020.116094.

83. Mulchandani, R.; Nilsson, H.O.; Wadstrom, T.; Joshi, B.R. Presence of *Helicobacter pylori* in Mumbai water. *Journal of Pure and Applied Microbiology* **2013**, *7*, 2315–2324.
84. Richards, C.L.; Broadaway, S.C.; Eggers, M.J.; Doyle, J.; Pyle, B.H.; Camper, A.K.; Ford, T.E. Detection of pathogenic and non-pathogenic bacteria in drinking water and associated biofilms on the crow reservation, Montana, USA. *Microbial Ecology* **2018**, *76*, 52–63, doi:10.1007/s00248-015-0595-6.
85. Al-Bahry, S.N.; Elshafie, A.E.; Victor, R.; Mahmoud, I.Y.; Al-Hinai, J.A. Opportunistic pathogens relative to physicochemical factors in water storage tanks. *Journal of Water and Health* **2011**, *9*, 382–393, doi:10.2166/wh.2011.054.
86. Boudouaya, H.A.; Melki, R.; Bouali, A.; Hamal, A.; Boukhatem, N. Prevalence of *Legionella* species in hot water of Moorish baths "Hammams" and domestic bathrooms in Oujda city, Morocco. *Journal of Materials and Environmental Science* **2017**, *8*, 1567–1573.
87. Byrne, B.G.; McColm, S.; McElmurry, S.P.; Kilgore, P.E.; Sobeck, J.; Sadler, R.; Love, N.G.; Swanson, M.S. Prevalence of infection-competent serogroup 6 *Legionella pneumophila* within premise plumbing in southeast Michigan. *mBio* **2018**, *9*, 1–17, doi:10.1128/mBio.00016-18.
88. Collins, S.; Stevenson, D.; Bennett, A.; Walker, J. Occurrence of *Legionella* in UK household showers. *International Journal of Hygiene and Environmental Health* **2017**, *220*, 401–406, doi:10.1016/j.ijheh.2016.12.001.
89. Rakić, A.; Perić, J.; Foglar, L. Influence of temperature, chlorine residual and heavy metals on the presence of *Legionella pneumophila* in hot water distribution systems. *Annals of Agricultural and Environmental Medicine* **2012**, *19*, 431–436.
90. Rakić, A.; Štambuk-Giljanović, N.; Foglar, L. Monitoring *Legionella pneumophila* in drinking water distribution systems in Southern Croatia. *Fresenius Environmental Bulletin* **2013**, *22*, 3390–3397.
91. Rakic, A.; Jurcev-Savicevic, A.; Stambuk-Giljanovic, N. The assessment of the risk factors on *Legionella* spp. presence in public supply water in permanently vs. seasonally open facilities. *Fresenius Environmental Bulletin* **2017**, *26*, 7353–7361.
92. Scaturro, M.; Fontana, S.; Crippa, S.; Caporali, M.G.; Seyler, T.; Veschetti, E.; Villa, G.; Rota, M.C.; Ricci, M.L. An unusually long-lasting outbreak of community-acquired Legionnaires' disease, 2005–2008, Italy. *Epidemiology and Infection* **2015**, *143*, 2416–2425, doi:10.1017/s0950268814003094.
93. Simmons, G.; Jury, S.; Thornley, C.; Harte, D.; Mohiuddin, J.; Taylor, M. A Legionnaires' disease outbreak: A water blaster and roof-collected rainwater systems. *Water Research* **2008**, *42*, 1449–1458, doi:10.1016/j.watres.2007.10.016.
94. Totaro, M.; Costa, A.L.; Frendo, L.; Profeti, S.; Casini, B.; Gallo, A.; Privitera, G.; Baggiani, A. Evaluation of *Legionella* spp. colonization in residential buildings having solar thermal system for hot water production. *International Journal of Environmental Research and Public Health* **2020**, *17*, 1–8, doi:10.3390/ijerph17197050.
95. Totaro, M.; Valentini, P.; Costa, A.L.; Frendo, L.; Cappello, A.; Casini, B.; Miccoli, M.; Privitera, G.; Baggiani, A. Presence of *Legionella* spp. in hot water networks of different Italian residential buildings: A three-year survey. *International Journal of Environmental Research and Public Health* **2017**, *14*, doi:10.3390/ijerph14111296.
96. Pastoris, M.C.; Viganò, E.F.; Passi, C. A family cluster of *Legionella pneumophila* infections. *Scandinavian Journal of Infectious Diseases* **1988**, *20*, 489–493, doi:10.3109/00365548809032496.
97. Ventura, R.J.; Muhi, E.; de los Reyes, V.C.; Sucaldito, M.N.; Tayag, E. A community-based gastroenteritis outbreak after Typhoon Haiyan, Leyte, Philippines, 2013. *Western Pacific surveillance and response journal : WPSAR* **2015**, *6*, 1–6, doi:10.2471/WPSAR.2014.5.1.010.
98. Peter, A.; Routledge, E. Present-day monitoring underestimates the risk of exposure to pathogenic bacteria from cold water storage tanks. *PLoS ONE* **2018**, *13*, doi:10.1371/journal.pone.0195635.
99. Hayes-Phillips, D.; Bentham, R.; Ross, K.; Whiley, H. Factors influencing *legionella* contamination of domestic household showers. *Pathogens* **2019**, *8*, doi:10.3390/pathogens8010027.
100. Ziwa, M.; Jovic, G.; Ngwisha, C.L.T.; Molnar, J.A.; Kwenda, G.; Samutela, M.; Mulowa, M.; Kalumbi, M.M. Common hydrotherapy practices and the prevalence of burn wound bacterial colonisation at the University Teaching Hospital in Lusaka, Zambia. *Burns* **2019**, *45*, 983–989, doi:10.1016/j.burns.2018.11.019.
101. French, G.L.; Otter, J.A.; Shannon, K.P.; Adams, N.M.T.; Watling, D.; Parks, M.J. Tackling contamination of the hospital environment by methicillin-resistant *Staphylococcus aureus* (MRSA): A comparison between conventional terminal cleaning and hydrogen peroxide vapour decontamination. *Journal of Hospital Infection* **2004**, *57*, 31–37, doi:10.1016/j.jhin.2004.03.006.
102. Sexton, J.D.; Tanner, B.D.; Maxwell, S.L.; Gerba, C.P. Reduction in the microbial load on high-touch surfaces in hospital rooms by treatment with a portable saturated steam vapor disinfection system. *American Journal of Infection Control* **2011**, *39*, 655–662, doi:10.1016/j.ajic.2010.11.009.

103. Kim, B.-R.; Bae, Y.-M.; Lee, S.-Y. Effect of environmental conditions on biofilm formation and related characteristics of *Staphylococcus aureus*. *Journal of Food Safety* **2016**, *36*, 412–422, doi:https://doi.org/10.1111/jfs.12263.
104. Neopane, P.; Nepal, H.P.; Shrestha, R.; Uehara, O.; Abiko, Y. In vitro biofilm formation by *Staphylococcus aureus* isolated from wounds of hospital-admitted patients and their association with antimicrobial resistance. *International journal of general medicine* **2018**, *11*, 25–32, doi:10.2147/IJGM.S153268.
105. Buzón-Durán, L.; Alonso-Calleja, C.; Riesco-Peláez, F.; Capita, R. Effect of sub-inhibitory concentrations of biocides on the architecture and viability of MRSA biofilms. *Food Microbiology* **2017**, *65*, 294–301, doi:https://doi.org/10.1016/j.fm.2017.01.003.
106. Speck, S.; Wenke, C.; Feßler, A.T.; Kacza, J.; Geber, F.; Scholtzek, A.D.; Hanke, D.; Eichhorn, I.; Schwarz, S.; Rosolowski, M., et al. Borderline resistance to oxacillin in *Staphylococcus aureus* after treatment with sub-lethal sodium hypochlorite concentrations. *Heliyon* **2020**, *6*, e04070–e04070, doi:10.1016/j.heliyon.2020.e04070.
107. Diaper, J.P.; Edwards, C. Survival of *Staphylococcus aureus* in lakewater monitored by flow cytometry. *Microbiology* **1994**, *140*, 35–42, doi:https://doi.org/10.1099/13500872-140-1-35.
108. Watson Sean, P.; Clements Mark, O.; Foster Simon, J. Characterization of the starvation-survival response of *Staphylococcus aureus*. *Journal of Bacteriology* **1998**, *180*, 1750–1758, doi:10.1128/JB.180.7.1750-1758.1998.
109. Huws, S.A.; Smith, A.W.; Enright, M.C.; Wood, P.J.; Brown, M.R. Amoebae promote persistence of epidemic strains of MRSA. *Environmental Microbiology* **2006**, *8*, 1130–1133, doi:10.1111/j.1462-2920.2006.00991.x.
110. Settanni, L.; Gaglio, R.; Stucchi, C.; De Martino, S.; Francesca, N.; Moschetti, G. Presence of pathogenic bacteria in ice cubes and evaluation of their survival in different systems. *Annals of Microbiology* **2017**, *67*, 827–835, doi:10.1007/s13213-017-1311-1.
119. Skogberg, K.; Nuorti, J.P.; Saxen, H.; Kusnetsov, J.; Mentula, S.; Fellman, V.; Maki-Petays, N.; Jousimies-Somer, H. A newborn with domestically acquired Legionnaires disease confirmed by molecular typing. *Clinical Infectious Diseases* **2002**, *35*, E82–E85, doi:10.1086/342886.
120. Bates, M.N.; Maas, E.; Martin, T.; Harte, D.; Grubner, M.; Margolin, T. Investigation of the prevalence of *Legionella* species in domestic hot water systems. *New Zealand Medical Journal* **2000**, *113*, 218–220.
121. Martinelli, F.; Caruso, A.; Moschini, L.; Turano, A.; Scarcella, C.; Speziani, F. A comparison of *Legionella pneumophila* occurrence in hot water tanks and instantaneous devices in domestic, nosocomial, and community environments. *Current Microbiology* **2000**, *41*, 374–376, doi:10.1007/s002840010152.
124. Mathys, W.; Stanke, J.; Harmuth, M.; Junge-Mathys, E. Occurrence of *Legionella* in hot water systems of single-family residences in suburbs of two German cities with special reference to solar and district heating. *International Journal of Hygiene and Environmental Health* **2008**, *211*, 179–185, doi:10.1016/j.ijheh.2007.02.004.
127. Chaidez, C.; Gerba, C.P. Comparison of the microbiologic quality of point-of-use (POU)-treated water and tap water. *International Journal of Environmental Health Research* **2004**, *14*, 253–260, doi:10.1080/09603120410001725595.
128. Josephson, K.L.; Rubino, J.R.; Pepper, I.L. Characterization and quantification of bacterial pathogens and indicator organisms in household kitchens with and without the use of a disinfectant cleaner *Journal of Applied Microbiology* **1997**, *83*, 737–750, doi:10.1046/j.1365-2672.1997.00308.x.
132. Von Baum, H.; Bommer, M.; Forke, A.; Holz, J.; Frenz, P.; Wellinghausen, N. Is domestic tap water a risk for infections in neutropenic patients? *Infection* **2010**, *38*, 181–186, doi:10.1007/s15010-010-0005-4.
136. Marshall, H.M.; Carter, R.; Torbey, M.J.; Minion, S.; Tolson, C.; Sidjabat, H.E.; Huygens, F.; Hargreaves, M.; Thomson, R.M. *Mycobacterium lentiflavum* in drinking water supplies, Australia. *Emerging Infectious Diseases* **2011**, *17*, 395–402, doi:10.3201/eid1703.090948.
141. Pellizari, V.H.; Martins, M.T. Occurrence of *Legionella* sp in water samples from man-made systems of Sao Paulo Brazil. *Revista De Microbiologia* **1995**, *26*, 186–191.
147. Buchbinder, S.; Trebesius, K.; Heesemann, J. Evaluation of detection of *Legionella* spp. in water samples by fluorescence in situ hybridization, PCR amplification and bacterial culture. *International Journal of Medical Microbiology* **2002**, *292*, 241–245, doi:10.1078/1438-4221-00213.
155. Erdoğan, H.; Arslan, H. Domestically acquired legionnaires' disease: Two case reports and a review of the pertinent literature. *Balkan Medical Journal* **2016**, *33*, 350–353, doi:10.5152/balkanmedj.2016.150529.
156. Falkinham Iii, J.O.; Iseman, M.D.; de Haas, P.; van Soolingen, D. *Mycobacterium avium* in a shower linked to pulmonary disease. *Journal of Water and Health* **2008**, *6*, 209–213, doi:10.2166/wh.2008.232.

157. Leverstein van Hall, M.A.; Verbon, A.; Huisman, M.V.; Kuijper, E.J.; Dankert, J. Reinfection with *Legionella pneumophila* documented by pulsed-field gel electrophoresis. *Clinical Infectious Diseases* **1994**, *19*, 1147–1149, doi:10.1093/clinids/19.6.1147.
158. Lück, P.C.; Leupold, I.; Hlawitschka, M.; Helbig, J.H.; Carmienke, I.; Jatzwauk, L.; Guderitz, T. Prevalence of *Legionella* species, serogroups, and monoclonal subgroups in hot water systems in south-eastern Germany. *Zentralblatt für Hygiene und Umweltmedizin = International journal of hygiene and environmental medicine* **1993**, *193*, 450–460.
159. Moran-Gilad, J.; Lazarovitch, T.; Mentasti, M.; Harrison, T.; Weinberger, M.; Mordish, Y.; Mor, Z.; Stocki, T.; Anis, E.; Sadik, C., et al. Humidifier-associated paediatric Legionnaires' disease, Israel, February 2012. *Eurosurveillance* **2012**, *17*, 2–5.
160. Ryu, S.; Yang, K.; Chun, B.C. Community-acquired Legionnaires' disease in a newly constructed apartment building. *Journal of Preventive Medicine and Public Health* **2017**, *50*, 274–277, doi:10.3961/jpmph.17.066.
161. Sax, H.; Dharan, S.; Pittet, D. Legionnaires' disease in a renal transplant recipient: Nosocomial or home-grown? *Transplantation* **2002**, *74*, 890–892, doi:10.1097/00007890-200209270-00028.
162. Schumacher, A.; Kocharian, A.; Koch, A.; Marx, J. Fatal case of Legionnaires' disease after home exposure to *Legionella pneumophila* serogroup 3 - Wisconsin, 2018. *MMWR. Morbidity and mortality weekly report* **2020**, *69*, 207–211, doi:10.15585/mmwr.mm6908a2.
163. Stout, J.E.; Li, V.L.; Muraca, P. Legionnaires' disease acquired within the homes of two patients: link to the home water supply. *JAMA: The Journal of the American Medical Association* **1987**, *257*, 1215–1217, doi:10.1001/jama.1987.03390090087029.
164. Stout, J.E.; yu, V.L.; Muraca, P.; Joly, J.; Troup, N.; Tompkins, L.S. Potable water as a cause of sporadic cases of community-acquired legionnaires' disease. *New England Journal of Medicine* **1992**, *326*, 151–155, doi:10.1056/NEJM199201163260302.
165. Young, M.; Smith, H.; Gray, B.; Huang, B.; Barten, J.; Towner, C.; Plowman, S.; Afshar, B.; Fry, N.; Blair, B., et al. The public health implications of a sporadic case of culture-proven Legionnaires' disease. *Australian and New Zealand Journal of Public Health* **2005**, *29*, 513–517, doi:10.1111/j.1467-842X.2005.tb00241.x.
171. Zietz, B.; Wiese, J.; Brengelmann, F.; Dunkelberg, H. Presence of Legionellaceae in warm water supplies and typing of strains by polymerase chain reaction. *Epidemiology and Infection* **2001**, *126*, 147–152, doi:10.1017/s0950268801005015.
172. Zhu, J.; Liu, R.; Cao, N.; Yu, J.; Liu, X.; Yu, Z. Mycobacterial metabolic characteristics in a water meter biofilm revealed by metagenomics and metatranscriptomics. *Water Research* **2019**, *153*, 315–323, doi:10.1016/j.watres.2019.01.032.
173. Yajko, D.M.; Chin, D.P.; Gonzalez, P.C.; Nassos, P.S.; Hopewell, P.C.; Reingold, A.L.; Horsburgh Jr, C.R.; Yakus, M.A.; Ostroff, S.M.; Hadley, W.K. *Mycobacterium avium* complex in water, food, and soil samples collected from the environment of HIV-infected individuals. *Journal of Acquired Immune Deficiency Syndromes and Human Retrovirology* **1995**, *9*, 176–182.
174. Whitby, J.L.; Rampling, A. *Pseudomonas aeruginosa* contamination in domestic and hospital environments. *The Lancet* **1972**, *299*, 15–17, doi:10.1016/S0140-6736(72)90006-2.
175. Wallet, F.; Emery, C.; Briand, E.; Cabanes, P.A. Prevalence of *Legionella* in domestic hot water systems in homes in France. *Environnement, Risques et Sante* **2016**, *15*, 29–38, doi:10.1684/ers.2016.0835.
176. Wallace Jr, R.J.; Iakhiaeva, E.; Williams, M.D.; Brown-Elliott, B.A.; Vasireddy, S.; Vasireddy, R.; Lande, L.; Peterson, D.D.; Sawicki, J.; Kwait, R., et al. Absence of *Mycobacterium intracellulare* and presence of *Mycobacterium chimaera* in household water and biofilm samples of patients in the United States with *Mycobacterium avium* complex respiratory disease. *J Clin Microbiol* **2013**, *51*, 1747–1752, doi:10.1128/JCM.00186-13.
177. Vornhagen, J.; Stevens, M.; McCormick, D.W.; Dowd, S.E.; Eisenberg, J.N.S.; Boles, B.R.; Rickard, A.H. Coaggregation occurs amongst bacteria within and between biofilms in domestic showerheads. *Biofouling* **2013**, *29*, 53–68, doi:10.1080/08927014.2012.744395.
178. von Reyn, C.F.; Arbeit, R.D.; Horsburgh, C.R.; Ristola, M.A.; Waddell, R.D.; Tvaroha, S.M.; Samore, M.; Hirschhorn, L.R.; Lumio, J.; Lein, A.D., et al. Sources of disseminated *Mycobacterium avium* infection in AIDS. *Journal of Infection* **2002**, *44*, 166–170, doi:10.1053/jinf.2001.0950.
179. Verhoef, L.P.B.; Yzerman, E.P.F.; Bruin, J.P.; Den Boer, J.W. Domestic exposure to legionellae for Dutch Legionnaires' disease patients. *Archives of Environmental Health* **2004**, *59*, 597–603, doi:10.1080/00039890409603439.
180. Vaz-Moreira, I.; Egas, C.; Nunes, O.C.; Manaia, C.M. Bacterial diversity from the source to the tap: a comparative study based on 16S rRNA gene-DGGE and culture-dependent methods. *Fems Microbiology Ecology* **2013**, *83*, 361–374, doi:10.1111/1574-6941.12002.

181. Van Ingen, J.; Blaak, H.; De Beer, J.; De Roda Husman, A.M.; Van Soolingen, D. Rapidly growing nontuberculous mycobacteria cultured from home tap and shower water. *Applied and Environmental Microbiology* **2010**, *76*, 6017–6019, doi:10.1128/AEM.00843-10.
182. Van Assche, A.; Crauwels, S.; De Brabanter, J.; Willems, K.A.; Lievens, B. Characterization of the bacterial community composition in water of drinking water production and distribution systems in Flanders, Belgium. *MicrobiologyOpen* **2019**, *8*, doi:10.1002/mbo3.726.
183. Tzou, C.L.; Dirac, M.A.; Becker, A.L.; Beck, N.K.; Weigel, K.M.; Meschke, J.S.; Cangelosi, G.A. Association between *Mycobacterium avium* complex pulmonary disease and mycobacteria in home water and soil a case-control study. *Annals of the American Thoracic Society* **2020**, *17*, 57–62, doi:10.1513/AnnalsATS.201812-915OC.
184. Tomari, K.; Morino, S.; Horikoshi, Y. Case of infantile *Legionella pneumonia* after bathing in reheated and reused water. *Pediatric Infectious Disease Journal* **2018**, *37*, 370–372, doi:10.1097/INF.0000000000001755.
185. Tokajian, S.; Hashwa, F. Microbiological quality and genotypic speciation of heterotrophic bacteria isolated from potable water stored in household tanks. *Water Quality Research Journal of Canada* **2004**, *39*, 64–73.
186. Tichenor, W.S.; Thurlow, J.; McNulty, S.; Brown-Elliott, B.A.; Wallace Jr, R.J.; Falkinham, J.O. Nontuberculous mycobacteria in household plumbing as possible cause of chronic rhinosinusitis. *Emerging Infectious Diseases* **2012**, *18*, 1612–1617, doi:10.3201/eid1810.120164.
187. Thomson, R.; Tolson, C.; Carter, R.; Coulter, C.; Huygens, F.; Hargreaves, M. Isolation of nontuberculous mycobacteria (NTM) from household water and shower aerosols in patients with pulmonary disease caused by NTM. *J Clin Microbiol* **2013**, *51*, 3006–3011, doi:10.1128/JCM.00899-13.
188. Takahara, M.; Kano, T.; Aiyoshi, M.; Fujino, T.; Otsuka, Y.; Saruta, K.; Kuratsuji, T.; Kirikae, T. Pulmonary *Mycobacterium avium* infection in an immunocompetent aged woman related to use of home bath with a circulating water system. *Japanese Journal of Infectious Diseases* **2002**, *55*, 213–214.
189. Straus, W.L.; Plouffe, J.F.; File, T.M.; Lipman, H.B.; Hackman, B.H.; Salstrom, S.J.; Benson, R.F.; Breiman, R.F.; Baird, I.; Emerick, J., et al. Risk factors for domestic acquisition of Legionnaires disease. *Archives of Internal Medicine* **1996**, *156*, 1685–1692, doi:10.1001/archinte.156.15.1685.
190. Stout, J.E.; Yu, V.L.; Yee, Y.C.; Vaccarello, S.; Diven, W.; Lee, T.C. *Legionella pneumophila* in residential water supplies: Environmental surveillance with clinical assessment for Legionnaires' disease. *Epidemiology and Infection* **1992**, *109*, 49–57.
191. Stojek, N.M.; Dutkiewicz, J. Co-existence of *Legionella* and other Gram-negative bacteria in potable water from various rural and urban sources. *Annals of Agricultural and Environmental Medicine* **2011**, *18*, 330–334.
192. Stephens, F.R. *Legionella* in domestic hot water systems: Out of 40 samples drawn from hot water cylinders, two (5%) were found to be contaminated with *Legionella* which was significantly less than the 50–70% found in larger hot water systems. *Building Research & Information* **1992**, *20*, 96–101, doi:10.1080/09613219208727184.
193. Speirs, J.P.; Anderton, A.; Anderson, J.G. A study of the microbial content of the domestic kitchen. *International Journal of Environmental Health Research* **1995**, *5*, 109–122, doi:10.1080/09603129509356839.
194. Slade, P.J.; Falah, M.A.; Alghady, A.M.R. Isolation of *Aeromonas hydrophila* from bottled waters and domestic water-supplies in Saudi Arabia. *Journal of Food Protection* **1986**, *49*, 471–476, doi:10.4315/0362-028x-49.6.471.
195. Silk, B.J.; Foltz, J.L.; Ngamsnga, K.; Brown, E.; Muñoz, M.G.; Hampton, L.M.; Jacobs-Slifka, K.; Kozak, N.A.; Underwood, J.M.; Krick, J., et al. Legionnaires' disease case-finding algorithm, attack rates, and risk factors during a residential outbreak among older adults: An environmental and cohort study. *BMC Infectious Diseases* **2013**, *13*, doi:10.1186/1471-2334-13-291.
196. Scott, E.; Duty, S.; McCue, K. A critical evaluation of methicillin-resistant *Staphylococcus aureus* and other bacteria of medical interest on commonly touched household surfaces in relation to household demographics. *American Journal of Infection Control* **2009**, *37*, 447–453, doi:10.1016/j.ajic.2008.12.001.
197. Scott, E.; Bloomfield, S.F. An investigation of microbial contamination in the home. *Journal of Hygiene* **1982**, *89*, 279–293, doi:10.1017/S0022172400070819.
198. Schulze-Robbeke, R.; Hartemann, P.; Fimmers, R.; Hagenau, C. Comparison of membrane filtration methods for the recovery of legionellae from naturally contaminated domestic drinking water supplies. *Zentralblatt Fur Hygiene Und Umweltmedizin* **1999**, *202*, 51–59, doi:10.1016/s0934-8859(99)80053-4.
199. Schulze-Röbbecke, R.; Janning, B.; Fischeder, R. Occurrence of mycobacteria in biofilm samples. *Tubercle and Lung Disease* **1992**, *73*, 141–144, doi:10.1016/0962-8479(92)90147-C.
200. Schelstraete, P.; Van Daele, S.; De Boeck, K.; Proesmans, M.; Lebecque, P.; Leclercq-Foucart, J.; Malfroot, A.; Vaneechoutte, M.; De Baets, F. *Pseudomonas aeruginosa* in the home environment of newly infected cystic fibrosis patients. *European Respiratory Journal* **2008**, *31*, 822–829, doi:10.1183/09031936.00088907.



201. Rhodes, G.; Richardson, H.; Hermon-Taylor, J.; Weightman, A.; Higham, A.; Pickup, R. *Mycobacterium avium* subspecies paratuberculosis: Human exposure through environmental and domestic aerosols. *Pathogens* **2014**, *3*, 577–595, doi:10.3390/pathogens3030577.
202. Rhoads, W.J.; Bradley, T.N.; Mantha, A.; Buttlings, L.; Keane, T.; Pruden, A.; Edwards, M.A. Residential water heater cleaning and occurrence of *Legionella* in Flint, MI. *Water Research* **2020**, *171*, doi:10.1016/j.watres.2019.115439.
203. Remold, S.K.; Brown, C.K.; Farris, J.E.; Hundley, T.C.; Perpich, J.A.; Purdy, M.E. Differential habitat use and niche partitioning by *Pseudomonas* species in human homes. *Microbial Ecology* **2011**, *62*, 505–517, doi:10.1007/s00248-011-9844-5.
204. Regnath, T.; Kreutzberger, M.; Illing, S.; Oehme, R.; Liesenfeld, O. Prevalence of *Pseudomonas aeruginosa* in households of patients with cystic fibrosis. *International Journal of Hygiene and Environmental Health* **2004**, *207*, 585–588, doi:10.1078/1438-4639-00331.
205. Ramalingam, B.; Sekar, R.; Boxall, J.B.; Biggs, C.A. Aggregation and biofilm formation of bacteria isolated from domestic drinking water. *Water Science and Technology: Water Supply* **2013**, *13*, 1016–1023, doi:10.2166/ws.2013.115.
206. Raghupathi, P.K.; Zupančič, J.; Brejnrod, A.D.; Jacquiod, S.; Houf, K.; Burmølle, M.; Gunde-Cimerman, N.; Sørensen, S.J. Microbial diversity and putative opportunistic pathogens in dishwasher biofilm communities. *Applied and Environmental Microbiology* **2018**, *84*, doi:10.1128/AEM.02755-17.
207. Purdy-Gibson, M.E.; France, M.; Hundley, T.C.; Eid, N.; Remold, S.K. *Pseudomonas aeruginosa* in CF and non-CF homes is found predominantly in drains. *Journal of Cystic Fibrosis* **2015**, *14*, 341–346, doi:10.1016/j.jcf.2014.10.008.
208. Pierre, D.; Baron, J.L.; Ma, X.; Sidari, F.P., III; Wagener, M.M.; Stout, J.E. Water quality as a predictor of *Legionella* positivity of building water systems. *Pathogens* **2019**, *8*, doi:10.3390/pathogens8040295.
209. Pieri, P.; Andra, S.S.; Charisiadis, P.; Demetriou, G.; Zambakides, N.; Makris, K.C. Variability of tap water residual chlorine and microbial counts at spatially resolved points of use. *Environmental Engineering Science* **2014**, *31*, 193–201, doi:10.1089/ees.2013.0480.
210. Pastoris, M.C.; Piscina, A.; Zanasi, A.; Frisoni, M.N. Home *Legionella* infection: A case report. *IRCS Medical Science* **1986**, *14*, 1017.
211. Omezuruike, O.I.; Damilola, A.O.; Adeola, O.T.; Fajobi, E.A.; Shittu, O.B. Microbiological and physicochemical analysis of different water samples used for domestic purposes in Abeokuta and Ojota, Lagos State, Nigeria. *African Journal of Biotechnology* **2008**, *7*, 617–621.
212. Okpara, J.; Maiwald, M.; Borneff, M.; Windeler, J.; Sonntag, H.G. Evaluation of a new version of the EnviroAmp(TM) *Legionella* kit for the detection of legionellae in water samples by the polymerase chain reaction. *Zentralblatt Fur Hygiene Und Umweltmedizin* **1996**, *198*, 502–513.
213. Ojima, M.; Toshima, Y.; Koya, E.; Ara, K.; Tokuda, H.; Kawai, S.; Kasuga, F.; Ueda, N. Hygiene measures considering actual distributions of microorganisms in Japanese households. *Journal of Applied Microbiology* **2002**, *93*, 800–809, doi:10.1046/j.1365-2672.2002.01746.x.
214. Ojima, M.; Toshima, Y.; Koya, E.; Ara, K.; Kawai, S.; Ueda, N. Bacterial contamination of Japanese households and related concern about sanitation. *International Journal of Environmental Health Research* **2002**, *12*, 41–52, doi:10.1080/09603120120110040.
215. Obi, C.L.; Ramalivhana, J.; Momba, M.N.B.; Igumbor, J. Scope and frequency of enteric bacterial pathogens isolated from HIV/AIDS patients and their household drinking water in Limpopo Province. *Water SA* **2007**, *33*, 539–548.
216. Nishiuchi, Y.; Maekura, R.; Kitada, S.; Tamaru, A.; Taguri, T.; Kira, Y.; Hiraga, T.; Hirotsu, A.; Yoshimura, K.; Miki, M., et al. The recovery of *Mycobacterium avium*-intracellulare complex (MAC) from the residential bathrooms of patients with pulmonary MAC. *Clinical Infectious Diseases* **2007**, *45*, 347–351, doi:10.1086/519383.
217. Napoli, C.; Fasano, F.; Iatta, R.; Barbuti, G.; Cuna, T.; Montagna, M.T. *Legionella* spp. and legionellosis in southeastern Italy: disease epidemiology and environmental surveillance in community and health care facilities. *Bmc Public Health* **2010**, *10*, doi:10.1186/1471-2458-10-660.
218. Montagna, M.T.; Napoli, C.; Tatò, D.; Spilotros, G.; Barbuti, G.; Barbuti, S. Clinical-environmental surveillance of legionellosis: An experience in Southern Italy. *European Journal of Epidemiology* **2006**, *21*, 325–331, doi:10.1007/s10654-006-0009-7.
219. Mohanty, P.S.; Naaz, F.; Katara, D.; Misba, L.; Kumar, D.; Dwivedi, D.K.; Tiwari, A.K.; Chauhan, D.S.; Bansal, A.K.; Tripathy, S.P., et al. Viability of *Mycobacterium leprae* in the environment and its role in leprosy dissemination. *Indian Journal of Dermatology Venereology & Leprology* **2016**, *82*, 23–27, doi:10.4103/0378-6323.168935.
220. Miyagi, K.; Sano, K.; Hirai, I. Sanitary evaluation of domestic water supply facilities with storage tanks and detection of *Aeromonas*, enteric and related bacteria in domestic water facilities in Okinawa Prefecture of Japan. *Water Research* **2017**, *119*, 171–177, doi:10.1016/j.watres.2017.04.002.

221. McBain, A.J.; Bartolo, R.G.; Catrenich, C.E.; Charbonneau, D.; Ledder, R.G.; Rickard, A.H.; Symmons, S.A.; Gilbert, P. Microbial characterization of biofilms in domestic drains and the establishment of stable biofilm microcosms. *Applied and Environmental Microbiology* **2003**, *69*, 177–185, doi:10.1128/aem.69.1.177-185.2003.
222. Marras, T.K.; Wallace, R.J.; Koth, L.L.; Stulbarg, M.S.; Cowl, C.T.; Daley, C.L. Hypersensitivity pneumonitis reaction to *Mycobacterium avium* in household water. *Chest* **2005**, *127*, 664–671, doi:10.1378/chest.127.2.664.
223. MacMartin, T.L.; Graham, C.I.; Farenhorst, A.; Brassinga, A.K.C. Complete genome sequences of two environmental *Legionella* isolates obtained from potable water sourced in a first nation community. *Microbiology Resource Announcements* **2021**, *10*, doi:10.1128/MRA.01237-20.
224. Lührig, K.; Canbäck, B.; Paul, C.J.; Johansson, T.; Persson, K.M.; Rådström, P. Bacterial community analysis of drinking water biofilms in southern Sweden. *Microbes and Environments* **2015**, *30*, 99–107, doi:10.1264/jisme2.ME14123.
225. Lück, P.C.; Schneider, T.; Wagner, J.; Walther, I.; Reif, U.; Weber, S.; Weist, K. Community-acquired Legionnaires' disease caused by *Legionella pneumophila* serogroup 10 linked to the private home. *Journal of Medical Microbiology* **2008**, *57*, 240–243, doi:10.1099/jmm.0.47382-0.
226. Liu, G.; Tao, Y.; Zhang, Y.; Lut, M.; Knibbe, W.J.; van der Wielen, P.; Liu, W.; Medema, G.; van der Meer, W. Hotspots for selected metal elements and microbes accumulation and the corresponding water quality deterioration potential in an unchlorinated drinking water distribution system. *Water Research* **2017**, *124*, 435–445, doi:10.1016/j.watres.2017.08.002.
227. Lin, W.F.; Ye, C.S.; Gu, L.Z.; Hu, D.; Yu, X. Analysis of microbial contamination of household water purifiers. *Applied Microbiology and Biotechnology* **2020**, *104*, 4533–4545, doi:10.1007/s00253-020-10510-5.
228. Lienard, J.; Croxatto, A.; Gervais, A.; Lévi, Y.; Loret, J.F.; Posfay-Barbe, K.M.; Greub, G. Prevalence and diversity of Chlamydiales and other amoeba-resisting bacteria in domestic drinking water systems. *New Microbes and New Infections* **2017**, *15*, 107–116, doi:10.1016/j.nmni.2016.10.003.
229. Levesque, B.; Simard, P.; Gauvin, D.; Gingras, S.; Dewailly, E.; Letarte, R. Comparison of the microbiological quality of water coolers and that of municipal water systems. *Applied and Environmental Microbiology* **1994**, *60*, 1174–1178, doi:10.1128/aem.60.4.1174-1178.1994.
230. Leoni, E.; De Luca, G.; Legnani, P.P.; Sacchetti, R.; Stampi, S.; Zanetti, F. *Legionella* waterline colonization: detection of *Legionella* species in domestic, hotel and hospital hot water systems. *Journal of Applied Microbiology* **2005**, *98*, 373–379, doi:10.1111/j.1365-2672.2004.02458.x.
231. Lecuona, M.; Abreu, R.; Rodríguez-Álvarez, C.; Castro, B.; Campos, S.; Hernández-Porto, M.; Mendoza, P.; Arias, A. First isolation of *Mycobacterium canariensis* from municipal water supplies in Tenerife, Canary Islands, Spain. *International Journal of Hygiene and Environmental Health* **2016**, *219*, 48–52, doi:10.1016/j.ijheh.2015.08.005.
232. Lande, L.; Alexander, D.C.; Wallace, R.J., Jr.; Kwait, R.; Iakhiaeva, E.; Williams, M.; Cameron, A.D.S.; Olshefsky, S.; Devon, R.; Vasireddy, R., et al. *Mycobacterium avium* in community and household water, suburban Philadelphia, Pennsylvania, USA, 2010–2012. *Emerging Infectious Diseases* **2019**, *25*, 473–481, doi:10.3201/eid2503.180336.
233. Kuroki, T.; Watanabe, Y.; Teranishi, H.; Izumiyama, S.; Amemura-Maekawa, J.; Kura, F. *Legionella* prevalence and risk of legionellosis in Japanese households. *Epidemiology and Infection* **2017**, *145*, 1398–1408, doi:10.1017/s0950268817000036.
234. Kohnen, W.; Teske-Keiser, S.; Meyer, H.G.; Loos, A.H.; Pietsch, M.; Jansen, B. Microbiological quality of carbonated drinking water produced with in-home carbonation systems. *International Journal of Hygiene and Environmental Health* **2005**, *208*, 415–423, doi:10.1016/j.ijheh.2005.04.008.
235. Kim, T.; Lye, D.; Donohue, M.; Mistry, J.H.; Pfaller, S.; Vesper, S.; Kirisits, M.J. Harvested rainwater quality before and after treatment and distribution in residential systems. *Journal - American Water Works Association* **2016**, *108*, E571–E584, doi:10.5942/jawwa.2016.108.0182.
236. Jones, F.; Ashcroft, C. Survey to detect *Legionella pneumophila* in potable waters in north west England. *Water and Environment Journal* **1988**, *2*, 460–464, doi:10.1111/j.1747-6593.1988.tb01325.x.
237. Joly, J. *Legionella* and domestic water heaters in the Quebec City area. *Canadian Medical Association Journal* **1985**, *132*, 160.
238. Jiang, L.; Zhao, S.; Cai, X.; Mu, D.; Zhang, X.; Kang, J.; Zhao, L.; Chen, Y. Sequence-based typing of clinical and environmental *Legionella pneumophila* isolates in Shenyang, China. *Enfermedades Infecciosas y Microbiología Clínica* **2020**, *10.1016/j.eimc.2020.06.012*, doi:10.1016/j.eimc.2020.06.012.
239. Islam, M.A.; Sakakibara, H.; Karim, M.R.; Sekine, M.; Mahmud, Z.H. Bacteriological assessment of drinking water supply options in coastal areas of Bangladesh. *Journal of Water and Health* **2011**, *9*, 415–428, doi:10.2166/wh.2011.114.
240. Ishimaru, N.; Suzuki, H.; Tokuda, Y.; Takano, T. Severe Legionnaires' disease with pneumonia and biopsy-confirmed myocarditis most likely caused by *Legionella pneumophila* serogroup 6. *Internal Medicine* **2012**, *51*, 3207–3212, doi:10.2169/internalmedicine.51.7952.

241. Isaac, T.S.; Sherchan, S.P. Molecular detection of opportunistic premise plumbing pathogens in rural Louisiana's drinking water distribution system. *Environmental Research* **2020**, *181*, doi:10.1016/j.envres.2019.108847.
242. Ichijo, T.; Izumi, Y.; Nakamoto, S.; Yamaguchi, N.; Nasu, M. Distribution and respiratory activity of mycobacteria in household water system of healthy volunteers in Japan. *PLoS ONE* **2014**, *9*, doi:10.1371/journal.pone.0110554.
243. Iakhiaeva, E.; Howard, S.T.; Brown Elliott, B.A.; McNulty, S.; Newman, K.L.; Falkinham Iii, J.O.; Williams, M.; Kwait, R.; Lande, L.; Vasireddy, R., et al. Variable-number tandem-repeat analysis of respiratory and household water biofilm isolates of "*Mycobacterium avium* subsp. *hominissuis*" with establishment of a PCR database. *J Clin Microbiol* **2016**, *54*, 891-901, doi:10.1128/JCM.02409-15.
244. Hull, N.M.; Reens, A.L.; Robertson, C.E.; Stanish, L.F.; Harris, J.K.; Stevens, M.J.; Frank, D.N.; Kotter, C.; Pace, N.R. Molecular analysis of single room humidifier bacteriology. *Water Research* **2015**, *69*, 318-327, doi:10.1016/j.watres.2014.11.024.
245. Honda, J.R.; Hasan, N.A.; Davidson, R.M.; Williams, M.D.; Epperson, L.E.; Reynolds, P.R.; Smith, T.; Iakhiaeva, E.; Bankowski, M.J.; Wallace, R.J., Jr., et al. Environmental nontuberculous Mycobacteria in the Hawaiian Islands. *PLoS Neglected Tropical Diseases* **2016**, *10*, doi:10.1371/journal.pntd.0005068.
246. Hankwitz, P.E.; Cervia, J.S.; Thomas, C.F.; Fink, J.N.; Marras, T.; Tomic, R. Nontuberculous mycobacterial hypersensitivity pneumonitis related to a home shower: Treatment and secondary prevention. *BMJ Case Reports* **2011**, 10.1136/bcr.06.2011.4360, doi:10.1136/bcr.06.2011.4360.
247. Haig, S.J.; Kotlarz, N.; Kalikin, L.M.; Chen, T.; Guikema, S.; LiPuma, J.J.; Raskin, L. Emerging investigator series: bacterial opportunistic pathogen gene markers in municipal drinking water are associated with distribution system and household plumbing characteristics. *Environmental Science-Water Research & Technology* **2020**, *6*, 3032-3043, doi:10.1039/d0ew00723d.
248. Haig, S.J.; Kotlarz, N.; Lipuma, J.J.; Raskin, L. A high-throughput approach for identification of nontuberculous mycobacteria in drinking water reveals relationship between water age and *Mycobacterium avium*. *mBio* **2018**, *9*, e02354-02317, doi:10.1128/mBio.02354-17.
249. Glover, N.; Aronson, T.; Froman, S.; Berlin, O.G.W.; Dominguez, P.; Kunkel, K.A. The isolation and identification of *Mycobacterium avium* complex (MAC) recovered from Los Angeles potable water, a possible source of infection in aids patients. *International Journal of Environmental Health Research* **1994**, *4*, 63-72, doi:10.1080/09603129409356800.
250. Germinario, C.; Tafuri, S.; Napoli, C.; Martucci, V.; Termite, S.; Pedote, P.; Montagna, M.T.; Quarto, M. An outbreak of pneumonia in a thermal water spa contaminated with *Pseudomonas aeruginosa*: An epidemiological and environmental concern. *African Journal of Microbiology Research* **2012**, *6*, 1978-1984, doi:10.5897/ajmr11.1085.
251. Gebert, M.J.; Delgado-Baquerizo, M.; Oliverio, A.M.; Webster, T.M.; Nichols, L.M.; Honda, J.R.; Chan, E.D.; Adjemian, J.; Dunn, R.R.; Fierer, N. Ecological analyses of mycobacteria in showerhead biofilms and their relevance to human health. *mBio* **2018**, *9*, 1-15, doi:10.1128/mbio.01614-18.
252. Garner, E.; Brown, C.L.; Schwake, D.O.; Rhoads, W.J.; Arango-Argoty, G.; Zhang, L.Q.; Jospin, G.; Coil, D.A.; Eisen, J.A.; Edwards, M.A., et al. Comparison of whole genome sequences of *Legionella pneumophila* in tap water and in clinical strains, Flint, Michigan, USA, 2016. *Emerging Infectious Diseases* **2019**, *25*, 2013-2020, doi:10.3201/eid2511.181032.
253. Fischeder, R.; Schulze-Röbbecke, R.; Weber, A. Occurrence of mycobacteria in drinking water samples. *International journal of hygiene and environmental medicine* **1991**, *192*, 154-158.
254. Farooqui, A.; Khan, A.; Kazmi, S.U. Investigation of a community outbreak of typhoid fever associated with drinking water. *BMC Public Health* **2009**, *9*, doi:10.1186/1471-2458-9-476.
255. Falkinham Iii, J.O. Nontuberculous mycobacteria from household plumbing of patients with nontuberculous mycobacteria disease. *Emerging Infectious Diseases* **2011**, *17*, 419-424, doi:10.3201/eid1703.101510.
256. Euser, S.M.; Pelgrim, M.; Den Boer, J.W. Legionnaires' disease and Pontiac fever after using a private outdoor whirlpool spa. *Scandinavian Journal of Infectious Diseases* **2010**, *42*, 910-916, doi:10.3109/00365548.2010.509331.
257. Eguchi, H.; Miyamoto, T.; Kuwahara, T.; Mitamura, S.; Mitamura, Y. Infectious conjunctivitis caused by *Pseudomonas aeruginosa* isolated from a bathroom. *BMC Research Notes* **2013**, *6*, doi:10.1186/1756-0500-6-245.
258. Dufresne, S.F.; Locas, M.C.; Duchesne, A.; Restieri, C.; Ismail, J.; Lefebvre, B.; Labbe, A.C.; Dion, R.; Plante, M.; Laverdiere, M. Sporadic Legionnaires' disease: the role of domestic electric hot-water tanks. *Epidemiology and Infection* **2012**, *140*, 172-181, doi:10.1017/s0950268811000355.

259. Dovriki, E.; Gerogianni, I.; Petinaki, E.; Hadjichristodoulou, C.; Papaioannou, A.; Gourgoulisanis, K. Isolation and identification of nontuberculous mycobacteria from hospitalized patients and drinking water samples-examination of their correlation by chemometrics. *Environmental Monitoring and Assessment* **2016**, *188*, doi:10.1007/s10661-016-5258-7.
260. Donohue, M.J.; O'Connell, K.; Vesper, S.J.; Mistry, J.H.; King, D.; Kostich, M.; Pfaller, S. Widespread molecular detection of *Legionella pneumophila* serogroup 1 in cold water taps across the United States. *Environmental Science and Technology* **2014**, *48*, 3145-3152, doi:10.1021/es4055115.
261. Donati, M.; Cremonini, E.; Di Francesco, A.; Dallolio, L.; Biondi, R.; Muthusamy, R.; Leoni, E. Prevalence of *Simkania negevensis* in chlorinated water from spa swimming pools and domestic supplies. *Journal of Applied Microbiology* **2015**, *118*, 1076-1082, doi:10.1111/jam.12761.
262. Dhruve, M.J.; Bunce, P.E.; D'Gama, C.; Chan, C.T. Case of *Mycobacterium mucogenicum* in a home hemodialysis patient. *Hemodialysis International* **2017**, *21*, E79-E81, doi:10.1111/hdi.12574.
263. Dewailly, E.; Joly, J.R. Contamination of domestic water heaters with *Legionella pneumophila*: Impact of water temperature on growth and dissemination of the bacterium. *Environmental Toxicology and Water Quality* **1991**, *6*, 249-257, doi:10.1002/tox.2530060213.
264. Denton, M.; Todd, N.J.; Kerr, K.G.; Hawkey, P.M.; Littlewood, J.M. Molecular epidemiology of *Stenotrophomonas maltophilia* isolated from clinical specimens from patients with cystic fibrosis and associated environmental samples. *J Clin Microbiol* **1998**, *36*, 1953-1958, doi:10.1128/jcm.36.7.1953-1958.1998.
265. de Victorica, J.; Galvan, M. *Pseudomonas aeruginosa* as an indicator of health risk in water for human consumption. *Water Science and Technology* **2001**, *43*, 49-52.
266. de Sotto, R.; Tang, R.; Bae, S. Biofilms in premise plumbing systems as a double-edged sword: microbial community composition and functional profiling of biofilms in a tropical region. *Journal of Water and Health* **2020**, *18*, 172-185, doi:10.2166/wh.2020.182.
267. Cooper, I.R.; White, J.; Mahenthiralingam, E.; Hanlon, G.W. Long-term persistence of a single *Legionella pneumophila* strain possessing the mip gene in a municipal shower despite repeated cycles of chlorination. *Journal of Hospital Infection* **2008**, *70*, 154-159, doi:10.1016/j.jhin.2008.06.015.
268. Colbourne, J.S.; Trew, R.M. Presence of *Legionella* in London's water supplies. *Israel Journal of Medical Sciences* **1986**, *22*, 633-639.
269. Cohn, P.D.; Gleason, J.A.; Rudowski, E.; Tsai, S.M.; Genese, C.A.; Fagliano, J.A. Community outbreak of legionellosis and an environmental investigation into a community water system. *Epidemiology and Infection* **2015**, *143*, 1322-1331, doi:10.1017/s0950268814001964.
270. Codony, F.; Álvarez, J.; Oliva, J.M.; Ciurana, B.; Company, M.; Camps, N.; Torres, J.; Minguell, S.; Jové, N.; Cirera, E., et al. Factors promoting colonization by *Legionellae* in residential water distribution systems: An environmental case-control survey. *European Journal of Clinical Microbiology and Infectious Diseases* **2002**, *21*, 717-721, doi:10.1007/s10096-002-0789-y.
271. Chouhan, S.; Pancholi, A.; Vyas, R. Sanitary analysis of sitaraam Jaju Sagar Dam, Neemuch, Madhya Pradesh. *Asian Journal of Microbiology, Biotechnology and Environmental Sciences* **2014**, *16*, 167-173.
272. Chen, Y.S.; Lin, W.R.; Liu, Y.C.; Chang, C.L.; Gan, V.L.; Huang, W.K.; Huang, T.S.; Wann, S.R.; Lin, H.H.; Lee, S.S.J., et al. Residential water supply as a likely cause of community-acquired Legionnaires' disease in an immunocompromised host. *European Journal of Clinical Microbiology & Infectious Diseases* **2002**, *21*, 706-709, doi:10.1007/s10096-002-0815-0.
273. Charnock, C.; Hagen, R.X.; Nguyen, T.N.T.; Vo, L.T. Diversion and phylogenetic relatedness of filterable bacteria from Norwegian tap and bottled waters. *Journal of Water and Health* **2019**, *17*, 295-307, doi:10.2166/wh.2019.284.
274. Chandra, S.; Saxena, T.; Nehra, S.; Mohan, M.K. Quality assessment of supplied drinking water in Jaipur city, India, using PCR-based approach. *Environmental Earth Sciences* **2016**, *75*, doi:10.1007/s12665-015-4809-5.
275. Chaidez, C.; Soto, M.; Martinez, C.; Keswick, B. Drinking water microbiological survey of the Northwestern State of Sinaloa, Mexico. *Journal of Water and Health* **2008**, *6*, 125-129, doi:10.2166/wh.2007.011.
276. Chaidez, C.; Candil-Ruiz, A.; Gerba, C.P. Microbiological survey of private roof water tanks in Culiacan, Mexico. *Journal of Environmental Science and Health* **1999**, *34*, 1967-1978, doi:10.1080/10934529909376942.
277. Castillo, M.; Bernabe, L.A.; Castaneda, C.A.; Chavez, I.; Ruiz, E.; Barreda, F.; Valdivia, D.; Suarez, N.; Nieves, J.; Dias-Neto, E., et al. *Helicobacter pylori* detected in tap water of peruvian patients with gastric cancer. *Asian Pacific Journal of Cancer Prevention* **2019**, *20*, 3193-3196, doi:10.31557/APJCP.2019.20.11.3193.
278. Burke, V.; Robinson, J.; Gracey, M.; Peterson, D.; Meyer, N.; Haley, V. Isolation of *Aeromonas* spp. from an unchlorinated domestic water supply. *Applied and Environmental Microbiology* **1984**, *48*, 367-370, doi:10.1128/aem.48.2.367-370.1984.

279. Burak, D.M.; Zeybek, Z. Investigation of *Legionella pneumophila* and free living amoebas in the domestic hot water systems in Istanbul. *Turkish Journal of Biology* **2011**, *35*, 679–685, doi:10.3906/biy-0907-93.
280. Buchholz, U.; Jahn, H.J.; Brodhun, B.; Lehfeld, A.S.; Lewandowsky, M.M.; Reber, F.; Adler, K.; Bochmann, J.; Förster, C.; Koch, M., et al. Source attribution of community-acquired cases of Legionnaires' disease—results from the German LeTriWa study; Berlin, 2016–2019. *PLoS ONE* **2020**, *15*, doi:10.1371/journal.pone.0241724.
281. Briancesco, R.; Semproni, M.; Libera, S.D.; Sdanganelli, M.; Bonadonna, L. Non-tuberculous mycobacteria and microbial populations in drinking water distribution systems. *Annali dell'Istituto Superiore di Sanita* **2010**, *46*, 254–258, doi:10.4415/ANN-10-03-05.
282. Borella, P.; Montagna, M.T.; Romano-Spica, V.; Stampi, S.; Stancanelli, G.; Triassi, M.; Neglia, R.; Marchesi, I.; Fantuzzi, G.; Tato, D., et al. *Legionella* infection risk from domestic hot water. *Emerging Infectious Diseases* **2004**, *10*, 457–464, doi:10.3201/eid1003.020707.
283. Baqai, R.; Zuberi, S.J. Bacteriological and protozoal study on domestic water supply in Karachi. *The Journal of the Pakistan Medical Association* **1991**, *41*, 33–35.
284. Bae, S.; Lyons, C.; Onstad, N. A culture-dependent and metagenomic approach of household drinking water from the source to point of use in a developing country. *Water Research X* **2019**, *2*, 1–11, doi:10.1016/j.wroa.2019.100026.
285. Augoustinos, M.T.; Venter, S.N.; Kfir, R. Assessment of water quality problems due to microbial growth in drinking water distribution systems. *Environmental Toxicology and Water Quality* **1995**, *10*, 295–299, doi:10.1002/tox.2530100410.
286. Aronson, T.; Holtzman, A.; Glover, N.; Boian, M.; Froman, S.; Berlin, O.G.W.; Hill, H.; Stelma, G. Comparison of large restriction fragments of *Mycobacterium avium* isolates recovered from AIDS and non-AIDS patients with those of isolates from potable water. *J Clin Microbiol* **1999**, *37*, 1008–1012, doi:10.1128/jcm.37.4.1008-1012.1999.
287. Arnow, P.M.; Weil, D.; Para, M.F. Prevalence and significance of *Legionella pneumophila* contamination of residential hot-tap water systems. *Journal of Infectious Diseases* **1985**, *152*, 145–151, doi:10.1093/infdis/152.1.145.
288. Arikawa, K.; Ichijo, T.; Nakajima, S.; Nishiuchi, Y.; Yano, H.; Tamaru, A.; Yoshida, S.; Maruyama, F.; Ota, A.; Nasu, M., et al. Genetic relatedness of *Mycobacterium avium* subsp. *hominissuis* isolates from bathrooms of healthy volunteers, rivers, and soils in Japan with human clinical isolates from different geographical areas. *Infection Genetics and Evolution* **2019**, *74*, doi:10.1016/j.meegid.2019.103923.
289. Ali, M.; Chandu, V.; Nandini, V.; Mostafa, M.; Alkendi, R. Evaluation of water quality in the households of Baniyas Region, Abu Dhabi using multivariate statistical approach. *Sustainable Water Resources Management* **2019**, *5*, 1579–1592, doi:10.1007/s40899-019-00320-7.
290. Alary, M.; Joly, J.R. Comparison of culture methods and an immunofluorescence assay for the detection of *Legionella pneumophila* in domestic hot water devices. *Current Microbiology* **1992**, *25*, 19–23, doi:10.1007/BF01570077.
291. Alary, M.; Joly, J.R. Risk factors for contamination of domestic hot water systems by *Legionellae*. *Applied and Environmental Microbiology* **1991**, *57*, 2360–2367, doi:10.1128/aem.57.8.2360-2367.1991.
